# Supplementary material
Source: PubMed Central journal article supplement (PMC4249064)
Supplement: JVI.01813-14_zjv999099715so1.pdf [file JVI.01813-14_zjv999099715so1.pdf]

## **Supplemental material**

### **Interactome analysis of the influenza A virus transcription/replication machinery identifies protein phosphatase 6 as a cellular factor required for efficient virus replication**

Ashley York, Edward C. Hutchinson and Ervin Fodor

Sir William Dunn School of Pathology, University of Oxford, Oxford, United Kingdom

Correspondence should be addressed to Ervin Fodor ([ervin.fodor@path.ox.ac.uk](mailto:ervin.fodor@path.ox.ac.uk))

Running title: Influenza virus RNA polymerase interactome

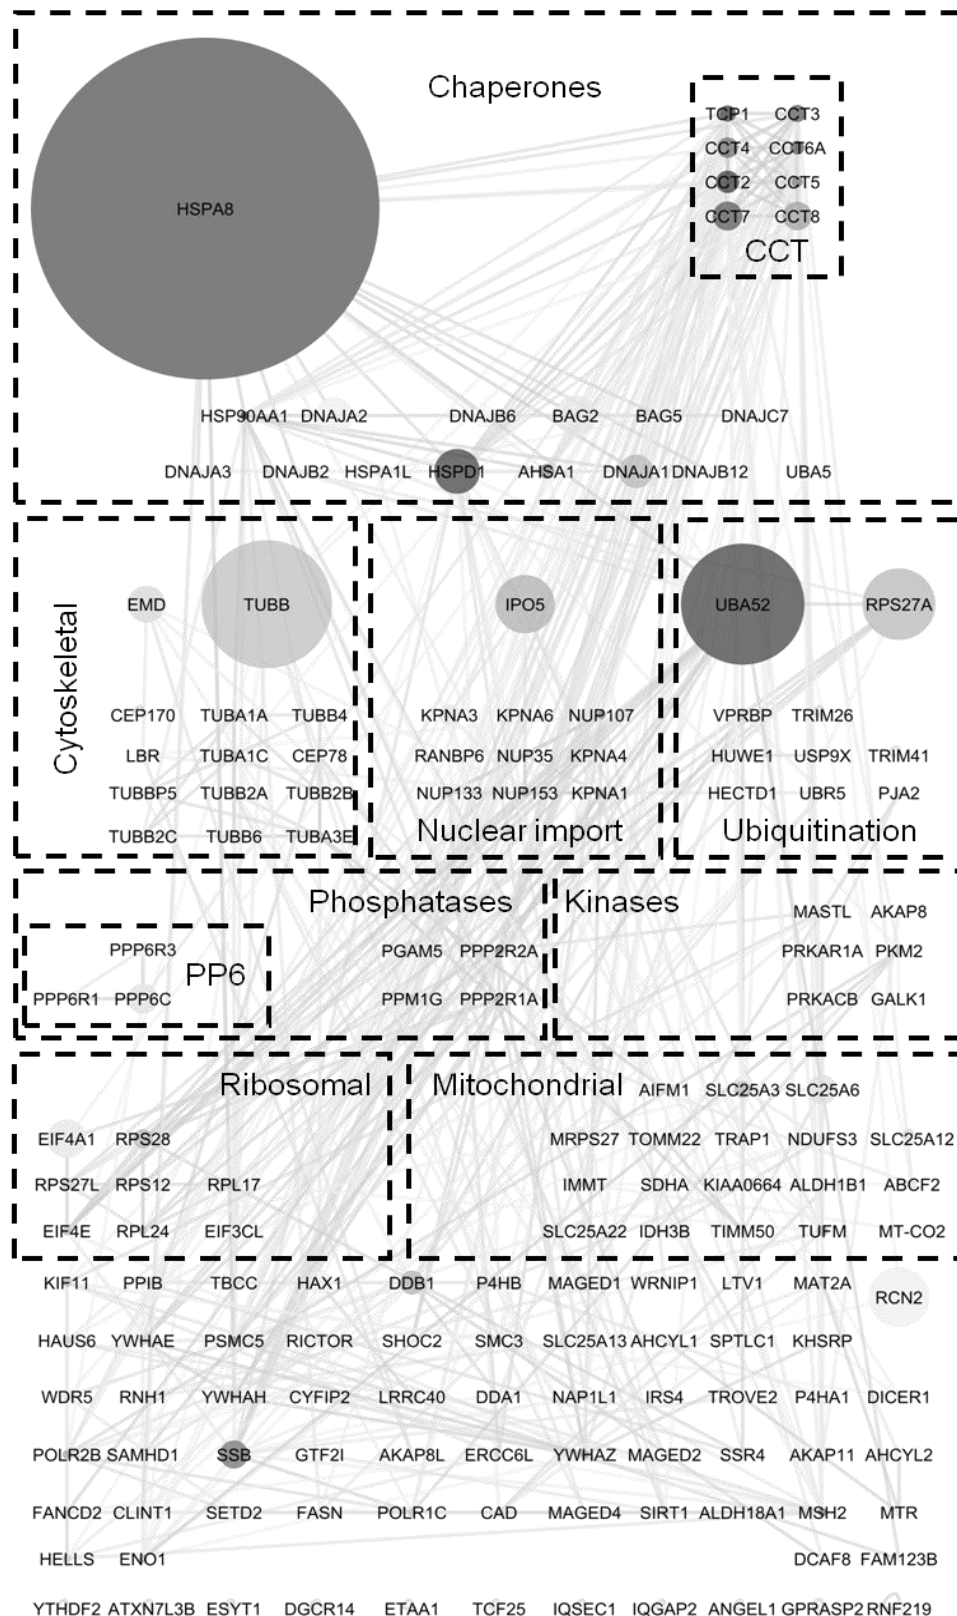

Fig S1. Interaction network of host proteins in the viral transcription/replication machinery interactome with node labelling. The interaction network of Figure 3B, with the short names of proteins shown. See the legend to Figure 3 for further details.

**Supplemental Table 1. Raw SINQ scores for identified proteins**

SINQ scores of identified proteins in PB2-Strep and WT (negative control) samples. Raw data from three experiments are shown. Decoy matches and common contaminants have been removed (see Materials and Methods for details).

<sup>a</sup>UniProt ID of human protein or viral protein name.

| Protein <sup>a</sup> | Description                                              | Experiment 1 |          | Experiment 2 |           | Experiment 3 |          |
|----------------------|----------------------------------------------------------|--------------|----------|--------------|-----------|--------------|----------|
|                      |                                                          | PB2-Strep    | WT       | PB2-Strep    | WT        | PB2-Strep    | WT       |
| HA                   | Influenza A/WSN/33 HA                                    | 8.928E-07    | 6.33E-07 | 2.87E-06     | 4.589E-06 | 1.713E-06    | 2.97E-06 |
| M1                   | Influenza A/WSN/33 M1                                    | 1.229E-06    | 1.1E-05  | 5.1E-06      | 1.877E-05 | 1.076E-06    | 4.55E-05 |
| NA                   | Influenza A/WSN/33 NA                                    | 1.626E-07    | 4.95E-08 | 3.24E-07     | 1.152E-07 | 5.163E-07    |          |
| NP                   | Influenza A/WSN/33 NP                                    | 0.0009755    | 7.56E-05 | 0.001128     | 4.572E-05 | 0.001287     | 4.65E-05 |
| NS1                  | Influenza A/WSN/33 NS1                                   | 3.973E-06    | 5.45E-05 | 2.92E-05     | 0.000182  | 1.083E-05    | 0.000103 |
| PA                   | Influenza A/WSN/33 PA                                    | 0.0001127    | 8.57E-07 | 7.93E-05     | 2.908E-06 | 6.666E-05    | 5.68E-07 |
| PB1                  | Influenza A/WSN/33 PB1                                   | 0.00012      | 1.16E-06 | 0.000115     | 1.904E-06 | 0.0001014    | 1.08E-06 |
| PB2-Strep            | Influenza A/WSN/33 PB2-Strep                             | 0.0001574    | 3.86E-06 | 0.000149     | 5.166E-06 | 0.0001229    | 1.47E-06 |
| O00267               | Transcription elongation factor SPT5                     | 1.927E-07    |          | 8.67E-08     | 1.116E-07 | 1.246E-07    | 3.85E-07 |
| O00410               | Importin-5                                               | 2.349E-06    |          | 2.31E-06     |           | 1.99E-06     |          |
| O00505               | Importin subunit alpha-4                                 | 8.294E-07    |          | 9.23E-07     | 1.501E-07 | 6.94E-07     |          |
| O00571               | ATP-dependent RNA helicase DDX3X                         | 3.957E-07    | 1.16E-06 | 4.69E-07     | 5.792E-06 | 1.169E-07    | 1.07E-05 |
| O00629               | Importin subunit alpha-3                                 | 6.319E-07    |          | 6.18E-07     | 7.277E-08 | 5.096E-07    |          |
| O00743               | Serine/threonine-protein phosphatase 6 catalytic subunit | 0.0000017    |          | 7.44E-07     |           | 9.832E-07    |          |
| O00763               | Acetyl-CoA carboxylase 2                                 | 3.268E-07    | 6.09E-07 | 2.34E-08     | 4.399E-07 |              |          |
| O14654               | Insulin receptor substrate 4                             | 1.959E-07    |          | 2.84E-07     | 3.872E-08 | 3.534E-07    |          |
| O14979               | Heterogeneous nuclear ribonucleoprotein D-like           |              | 1.03E-06 | 3.18E-08     | 6.364E-07 | 4.165E-09    | 1.07E-06 |
| O43164               | E3 ubiquitin-protein ligase Praja-2                      | 1.766E-07    |          | 4.66E-07     |           | 3.729E-07    |          |
| O43390               | Heterogeneous nuclear ribonucleoprotein R                | 7.728E-08    | 8.62E-07 | 6.16E-08     | 1.142E-06 | 1.199E-08    | 3.11E-06 |
| O43865               | Putative adenosylhomocysteinase 2                        | 1.655E-08    |          | 8.83E-08     |           | 1.099E-07    |          |
| O60506               | Heterogeneous nuclear ribonucleoprotein Q                | 1.158E-08    | 3.44E-07 | 5.56E-07     | 5.871E-06 | 2.774E-08    | 1.39E-05 |
| O60518               | Ran-binding protein 6                                    | 2.086E-08    |          |              |           |              |          |
| O60684               | Importin subunit alpha-7                                 | 2.27E-08     |          | 5.22E-07     | 4.495E-08 | 4.087E-07    | 6.58E-08 |
| O60814               | Histone H2B type 1-K                                     | 2.081E-07    | 4.35E-05 | 4.8E-07      | 4.404E-06 | 1.723E-07    | 5.54E-06 |
| O60884               | DnaJ homolog subfamily A member 2                        | 1.257E-07    |          | 2.48E-06     | 4.181E-08 | 1.477E-06    |          |
| O75153               | Clustered mitochondria protein homolog                   | 5.577E-08    |          | 4.91E-08     |           | 5.781E-08    |          |
| O75190               | DnaJ homolog subfamily B member 6                        | 1.871E-07    |          | 6.01E-07     |           | 1.414E-06    |          |
| O75367               | Core histone macro-H2A.1                                 |              | 3.23E-07 |              |           |              |          |
| O75531               | Barrier-to-autointegration factor                        |              | 8.54E-08 | 7.24E-07     | 0.0000103 | 1.295E-07    | 3.2E-06  |
| O95831               | Apoptosis-inducing factor 1, mitochondrial               | 1.311E-07    |          | 4.48E-07     | 1.81E-07  | 3.624E-07    |          |
| P00915               | Carbonic anhydrase 1                                     | 7.766E-08    | 9.99E-08 |              |           |              |          |

|        |                                                                   |           |          |          |           |           |          |  |  |
|--------|-------------------------------------------------------------------|-----------|----------|----------|-----------|-----------|----------|--|--|
| P00918 | Carbonic anhydrase 2                                              | 4.444E-08 | 5.68E-08 |          |           |           |          |  |  |
| P02545 | Prelamin-A/C                                                      |           | 1.89E-08 | 1.08E-06 | 1.143E-05 | 9.634E-08 | 8.37E-06 |  |  |
| P04406 | Glyceraldehyde-3-phosphate dehydrogenase                          |           | 1.2E-06  | 5.75E-07 | 3.821E-06 | 6.634E-07 | 1.75E-06 |  |  |
| P05141 | ADP/ATP translocase 2                                             | 2.443E-06 | 1.63E-06 | 8.52E-07 | 1.956E-06 | 6.114E-07 | 8.36E-07 |  |  |
| P05165 | Propionyl-CoA carboxylase alpha chain, mitochondrial              | 1.311E-05 | 3.42E-05 | 8.56E-06 | 5.866E-05 | 6.245E-06 | 4.35E-05 |  |  |
| P05166 | Propionyl-CoA carboxylase beta chain, mitochondrial               | 1.762E-05 | 3.77E-05 | 6.5E-06  | 5.076E-05 | 8.075E-06 | 5.08E-05 |  |  |
| P06748 | Nucleophosmin                                                     | 9.709E-08 | 7.96E-06 | 4.52E-06 | 8.153E-05 | 9.964E-07 | 3.23E-05 |  |  |
| P07437 | Tubulin beta chain                                                | 5.747E-07 | 5.33E-08 | 9.56E-06 | 3.704E-06 | 4.269E-06 | 1.73E-06 |  |  |
| P08107 | Heat shock 70 kDa protein 1A/1B                                   | 8.283E-06 | 2.7E-06  | 1.49E-05 | 1.613E-05 | 1.221E-05 | 1.27E-05 |  |  |
| P08670 | Vimentin                                                          |           | 1.88E-06 |          |           |           |          |  |  |
| P09651 | Heterogeneous nuclear ribonucleoprotein A1                        | 3.048E-06 | 1.07E-05 | 1.1E-05  | 6.319E-05 | 4.878E-06 | 9.33E-05 |  |  |
| P09874 | Poly [ADP-ribose] polymerase 1                                    | 2.577E-06 | 8.27E-06 | 8.78E-07 | 5.881E-06 | 7.44E-08  | 1.25E-05 |  |  |
| P0C0S5 | Histone H2A.Z                                                     |           | 3.05E-06 | 1.64E-07 | 9.269E-07 |           |          |  |  |
| P10155 | 60 kDa SS-A/Ro ribonucleoprotein                                  | 2.067E-07 |          | 8.08E-08 |           | 3.629E-07 |          |  |  |
| P10809 | 60 kDa heat shock protein, mitochondrial                          | 9.024E-09 |          | 2.73E-06 | 9.099E-07 | 2.148E-06 | 3.62E-08 |  |  |
| P11021 | 78 kDa glucose-regulated protein                                  |           | 5.99E-07 | 6.47E-07 | 2.306E-06 | 5.381E-07 | 1.24E-06 |  |  |
| P11142 | Heat shock cognate 71 kDa protein                                 | 1.383E-05 | 3.56E-06 | 1.42E-05 | 8.44E-06  | 1.114E-05 | 6.07E-06 |  |  |
| P11182 | Branched-chain alpha-keto acid dehydrogenase complex component E2 | 1.906E-06 | 1.27E-05 | 4.23E-06 | 1.998E-05 | 2.619E-06 | 2.21E-05 |  |  |
| P11387 | DNA topoisomerase 1                                               |           | 1.75E-07 | 9.89E-08 | 3.463E-06 |           | 2.33E-06 |  |  |
| P11388 | DNA topoisomerase 2-alpha                                         | 3.12E-07  | 5.76E-06 | 1.78E-06 | 1.598E-05 | 6.105E-07 | 1.29E-05 |  |  |
| P11498 | Pyruvate carboxylase, mitochondrial                               | 8.731E-06 | 2.88E-05 | 1.71E-06 | 1.363E-05 | 1.397E-06 | 1.05E-05 |  |  |
| P12236 | ADP/ATP translocase 3                                             | 3.426E-06 | 3.69E-08 | 1.98E-07 | 1.643E-07 | 4.365E-08 | 7.17E-07 |  |  |
| P12956 | X-ray repair cross-complementing protein 6                        | 1.163E-07 | 1.45E-06 | 3.68E-07 | 5.243E-06 | 4.332E-08 | 8.73E-06 |  |  |
| P13010 | X-ray repair cross-complementing protein 5                        | 3.164E-07 | 2.59E-06 | 2.75E-07 | 3.828E-06 | 7.185E-08 | 6.12E-06 |  |  |
| P14678 | Small nuclear ribonucleoprotein-associated proteins B and B'      |           | 5.18E-07 | 1.81E-07 | 1.396E-06 | 2.202E-08 | 4.92E-07 |  |  |
| P14866 | Heterogeneous nuclear ribonucleoprotein L                         | 6.51E-07  | 7.59E-06 | 2.8E-06  | 3.136E-05 | 6.77E-07  | 2.83E-05 |  |  |
| P15880 | 40S ribosomal protein S2                                          | 1.077E-06 | 2.46E-06 | 1.97E-06 | 2.092E-06 | 1.747E-06 | 1.98E-06 |  |  |
| P16104 | Histone H2AX                                                      | 2.981E-06 | 2.87E-05 |          | 3.113E-08 |           |          |  |  |
| P16403 | Histone H1.2                                                      | 8.479E-07 | 5.66E-06 | 2.61E-07 | 1.749E-06 | 2.982E-07 | 1.03E-06 |  |  |
| P17612 | cAMP-dependent protein kinase catalytic subunit alpha             | 1.862E-07 | 1.14E-07 | 1.44E-07 |           | 1.31E-08  |          |  |  |
| P17844 | Probable ATP-dependent RNA helicase DDX5                          | 4.979E-09 | 5.62E-07 | 3.23E-07 | 3.655E-06 | 1.773E-07 | 5.99E-06 |  |  |
| P17987 | T-complex protein 1 subunit alpha                                 | 5.027E-07 |          | 5.64E-07 |           | 7.288E-07 |          |  |  |
| P19338 | Nucleolin                                                         | 1.163E-08 | 2.12E-06 | 4.92E-07 | 3.023E-06 | 2.864E-07 | 3.18E-06 |  |  |
| P20700 | Lamin-B1                                                          | 2.816E-07 | 1.64E-06 | 2.58E-06 | 2.353E-05 | 2.335E-07 | 2.6E-05  |  |  |
| P22061 | Protein-L-isoaspartate(D-aspartate) O-methyltransferase           |           | 1.59E-06 | 6.5E-07  | 1.006E-05 | 2.84E-07  | 2.41E-06 |  |  |
| P22087 | rRNA 2'-O-methyltransferase fibrillar                             |           | 1.74E-07 | 1.11E-07 | 2.46E-06  | 2.993E-08 | 2.35E-06 |  |  |
| P22626 | Heterogeneous nuclear ribonucleoproteins A2/B1                    | 5.596E-06 | 7.16E-05 | 8.33E-06 | 0.0002229 | 7.06E-06  | 0.000135 |  |  |
| P22694 | cAMP-dependent protein kinase catalytic subunit beta              | 8.702E-09 |          | 7.96E-09 |           | 2.737E-07 |          |  |  |
| P23246 | Splicing factor, proline- and glutamine-rich                      |           | 1.66E-07 | 3.65E-07 | 2.194E-06 | 3.073E-08 | 4.83E-06 |  |  |

|        |                                                      |           |          |          |           |           |          |
|--------|------------------------------------------------------|-----------|----------|----------|-----------|-----------|----------|
| P23396 | 40S ribosomal protein S3                             | 5.056E-06 | 8.44E-06 | 3.58E-06 | 1.123E-05 | 4.164E-06 | 5.8E-06  |
| P26196 | Probable ATP-dependent RNA helicase DDX6             | 1.27E-07  | 9.2E-07  | 1.74E-07 | 5.142E-06 | 2.371E-07 | 6.33E-06 |
| P26368 | Splicing factor U2AF 65 kDa subunit                  |           | 2.27E-07 | 2.07E-07 | 2.398E-06 |           | 5.11E-06 |
| P26599 | Polypyrimidine tract-binding protein 1               | 9.447E-08 | 6.96E-06 | 9.84E-07 | 1.541E-05 | 1.768E-07 | 1.75E-05 |
| P26641 | Elongation factor 1-gamma                            | 7.107E-08 |          | 1.51E-07 | 1.069E-06 | 1.153E-07 |          |
| P27708 | CAD protein                                          | 6.754E-08 |          | 8.07E-08 | 2.026E-08 | 9.334E-08 |          |
| P30050 | 60S ribosomal protein L12                            | 3.98E-07  | 1.8E-06  | 4.74E-06 | 4.123E-05 | 6.572E-07 | 4.22E-05 |
| P31689 | DnaJ homolog subfamily A member 1                    | 5.794E-07 |          | 2.04E-06 | 1.504E-07 | 1.169E-06 | 3.11E-07 |
| P31942 | Heterogeneous nuclear ribonucleoprotein H3           | 1.987E-08 | 1.23E-06 | 6.57E-07 | 7.11E-06  | 1.564E-07 | 2.17E-06 |
| P31943 | Heterogeneous nuclear ribonucleoprotein H            | 5.95E-08  | 1.29E-06 | 5.77E-07 | 2.224E-06 | 7.657E-07 | 7.85E-06 |
| P32969 | 60S ribosomal protein L9                             | 9.301E-08 | 1.71E-07 | 2.15E-07 | 0.000012  | 1.336E-07 | 1.76E-05 |
| P34931 | Heat shock 70 kDa protein 1-like                     | 5.774E-08 |          |          |           |           |          |
| P35268 | 60S ribosomal protein L22                            |           | 4.39E-06 | 2.24E-06 | 1.644E-05 | 4.363E-07 | 1.05E-05 |
| P38159 | RNA-binding motif protein, X chromosome              | 8.015E-08 | 5.88E-06 | 3.22E-07 | 4.499E-06 | 2.649E-07 | 2.46E-06 |
| P38646 | Stress-70 protein, mitochondrial                     | 1.923E-07 | 6.01E-06 | 3.8E-06  | 1.014E-05 | 2.302E-06 | 7.09E-06 |
| P38919 | Eukaryotic initiation factor 4A-III                  |           | 5.79E-07 | 2.05E-09 | 8.541E-07 |           | 1.19E-06 |
| P40227 | T-complex protein 1 subunit zeta                     | 2.467E-07 |          | 8.07E-07 |           | 4.803E-07 |          |
| P40939 | Trifunctional enzyme subunit alpha, mitochondrial    | 1.912E-06 | 3.03E-07 | 1.32E-06 | 3.247E-06 | 9.642E-07 | 1.83E-06 |
| P41159 | Leptin                                               | 1.053E-07 | 3.09E-07 |          |           |           |          |
| P42166 | Lamina-associated polypeptide 2, isoform alpha       |           | 3.76E-07 |          |           |           |          |
| P42677 | 40S ribosomal protein S27                            | 3.002E-06 | 4.01E-06 | 9.92E-06 | 9.028E-06 | 1.198E-05 | 2.7E-06  |
| P43243 | Matrin-3                                             | 1.004E-08 | 1.53E-06 | 3.95E-07 | 3.63E-06  | 2.055E-07 | 2.7E-06  |
| P45880 | Voltage-dependent anion-selective channel protein 2  |           | 1.28E-06 | 6.26E-07 | 3.658E-06 | 5.216E-07 | 2.33E-06 |
| P46013 | Antigen KI-67                                        |           | 1.13E-07 | 3.59E-09 | 4.658E-08 |           |          |
| P46781 | 40S ribosomal protein S9                             | 5.184E-07 | 6.93E-07 | 8.9E-07  | 3.707E-06 | 5.065E-07 | 2.27E-06 |
| P48643 | T-complex protein 1 subunit epsilon                  | 1.627E-07 |          | 5.6E-07  |           | 4.998E-07 |          |
| P49368 | T-complex protein 1 subunit gamma                    | 2.634E-07 |          | 1.08E-06 |           | 5.873E-07 |          |
| P49411 | Elongation factor Tu, mitochondrial                  | 9.824E-07 | 1.57E-08 | 8.1E-08  |           | 2.053E-07 |          |
| P49916 | DNA ligase 3                                         |           | 2.86E-07 | 1.36E-08 | 2.412E-07 |           | 1.99E-07 |
| P50402 | Emerin                                               | 1.79E-07  |          | 2.17E-06 | 6.308E-07 | 1.688E-06 |          |
| P50991 | T-complex protein 1 subunit delta                    | 1.074E-07 |          | 1.16E-06 |           | 9.794E-07 | 4.3E-08  |
| P51571 | Translocon-associated protein subunit delta          | 3.794E-07 |          | 2.15E-07 |           | 3.305E-07 |          |
| P51991 | Heterogeneous nuclear ribonucleoprotein A3           | 1.052E-08 | 3.03E-06 | 8.33E-07 | 0.0000106 | 1.747E-07 | 1.69E-05 |
| P52272 | Heterogeneous nuclear ribonucleoprotein M            | 1.743E-07 | 3.23E-06 | 1.91E-07 | 1.377E-06 | 2.677E-08 | 2.1E-06  |
| P52292 | Importin subunit alpha-1                             |           | 1.64E-06 | 2.74E-07 | 4.333E-06 | 1.136E-07 | 3.04E-06 |
| P52294 | Importin subunit alpha-5                             | 2.269E-07 |          | 1.88E-07 |           | 8.174E-08 |          |
| P52597 | Heterogeneous nuclear ribonucleoprotein F            |           | 2.28E-08 | 5.63E-07 | 1.081E-06 | 5.413E-07 | 4.79E-07 |
| P55084 | Trifunctional enzyme subunit beta, mitochondrial     | 1.839E-06 | 2.72E-08 | 1.58E-06 | 3.45E-06  | 8.028E-07 | 2.54E-06 |
| P55884 | Eukaryotic translation initiation factor 3 subunit B |           | 2.91E-08 |          |           | 5.991E-09 |          |

|        |                                                                 |           |          |          |           |           |          |
|--------|-----------------------------------------------------------------|-----------|----------|----------|-----------|-----------|----------|
| P61247 | 40S ribosomal protein S3a                                       | 1.265E-07 | 2.03E-06 | 8.21E-07 | 1.719E-06 | 7.966E-07 | 3.53E-07 |
| Q5T6W5 | Heterogeneous nuclear ribonucleoprotein K                       | 6.531E-08 | 3.07E-06 | 4.36E-08 | 2.35E-07  |           | 5.81E-07 |
| P62081 | 40S ribosomal protein S7                                        | 1.679E-07 | 9.66E-08 | 1.16E-06 | 2.165E-05 | 2.231E-07 | 3.34E-05 |
| P62140 | Serine/threonine-protein phosphatase PP1-beta catalytic subunit | 1.701E-08 | 7.49E-07 | 2.23E-08 | 2.049E-07 |           | 3.79E-07 |
| P62241 | 40S ribosomal protein S8                                        | 7.112E-07 | 2.54E-06 | 3.8E-07  | 2.077E-06 | 5.723E-07 | 1.04E-06 |
| P62244 | 40S ribosomal protein S15a                                      | 7.33E-07  | 7.32E-06 | 1.46E-06 | 1.033E-05 | 8.154E-07 | 1.04E-05 |
| P62249 | 40S ribosomal protein S16                                       | 1.264E-06 | 2.51E-06 | 1.61E-06 | 7.502E-06 | 2.566E-06 | 3.98E-06 |
| P62263 | 40S ribosomal protein S14                                       | 1.152E-07 | 2.07E-06 | 3E-06    | 1.277E-05 | 4.344E-06 | 8.24E-06 |
| P62266 | 40S ribosomal protein S23                                       |           | 1.12E-07 |          |           | 1.207E-07 |          |
| P62277 | 40S ribosomal protein S13                                       |           | 1.09E-07 | 5.23E-07 | 1.357E-06 | 3.842E-07 | 4.39E-07 |
| P62280 | 40S ribosomal protein S11                                       | 3.438E-06 | 3.01E-06 | 9.38E-07 | 1.335E-06 | 9.94E-07  | 9.35E-07 |
| P62314 | Small nuclear ribonucleoprotein Sm D1                           | 1.349E-06 | 2.39E-07 | 5.29E-08 | 3.828E-06 |           | 2.13E-05 |
| P62701 | 40S ribosomal protein S4, X isoform                             | 8.853E-07 | 1.37E-05 | 2.58E-06 | 0.0000131 | 2.005E-06 | 1.81E-05 |
| P62753 | 40S ribosomal protein S6                                        | 1.858E-07 | 4.57E-07 | 3.18E-07 | 5.662E-07 | 4.692E-07 | 5.08E-07 |
| P62805 | Histone H4                                                      | 5.7E-07   | 9.37E-05 | 4.06E-07 | 1.297E-05 | 1.943E-07 | 1.4E-05  |
| P62829 | 60S ribosomal protein L23                                       | 4.833E-06 | 6.65E-06 | 5.78E-06 | 1.772E-05 | 4.801E-06 | 7.69E-06 |
| P62899 | 60S ribosomal protein L31                                       | 1.632E-07 |          | 9.38E-07 | 1.529E-06 | 7.354E-08 | 1.99E-06 |
| P62913 | 60S ribosomal protein L11                                       | 4.667E-07 | 1.68E-06 | 1.87E-07 | 4.186E-06 | 3.211E-07 | 3.38E-06 |
| P62987 | Ubiquitin-60S ribosomal protein L40                             | 5.933E-06 | 2.69E-06 | 4.02E-06 | 2.968E-06 |           |          |
| P62995 | Transformer-2 protein homolog beta                              | 8.357E-08 | 4.49E-07 | 7.68E-09 | 1.009E-06 |           | 1.39E-06 |
| P63173 | 60S ribosomal protein L38                                       | 3.985E-07 | 2.1E-06  | 3.1E-06  | 2.297E-06 | 9.6E-07   | 1.55E-05 |
| P63261 | Actin, cytoplasmic 2                                            | 3.057E-07 | 1.01E-05 |          |           |           |          |
| P67809 | Nuclease-sensitive element-binding protein 1                    | 5.384E-08 | 7.16E-08 | 5.04E-07 | 9.164E-07 | 3.356E-07 | 6.83E-08 |
| P68104 | Elongation factor 1-alpha 1                                     | 4.513E-06 | 6.89E-06 | 2.4E-06  | 1.991E-05 | 1.839E-06 | 1.1E-05  |
| P68363 | Tubulin alpha-1B chain                                          | 1.016E-07 | 1.22E-08 | 4E-08    | 3.418E-07 | 2.601E-07 | 6.02E-07 |
| P68371 | Tubulin beta-4B chain                                           | 1.102E-06 | 5.81E-07 | 2.5E-06  | 9.213E-07 | 8.245E-07 | 6.97E-08 |
| P68431 | Histone H3.1                                                    |           | 2.28E-06 |          |           |           |          |
| P78527 | DNA-dependent protein kinase catalytic subunit                  | 3.258E-09 |          | 3.63E-08 | 9.075E-08 | 2.963E-08 | 4.17E-08 |
| P81605 | Dermcidin                                                       | 1.737E-06 | 2.91E-07 | 4.01E-07 | 2.347E-06 | 7.03E-06  | 1.31E-05 |
| P84098 | 60S ribosomal protein L19                                       | 5.472E-08 | 9.14E-08 | 7.79E-07 | 1.368E-06 | 7.198E-07 | 1.13E-07 |
| P84103 | Serine/arginine-rich splicing factor 3                          | 9.121E-08 | 2.27E-06 | 1.22E-06 | 1.527E-05 |           | 7.45E-06 |
| P84243 | Histone H3.3                                                    |           | 7.59E-07 |          |           |           |          |
| Q00325 | Phosphate carrier protein, mitochondrial                        | 1.225E-06 |          | 1.88E-07 | 2.674E-07 |           |          |
| Q00610 | Clathrin heavy chain 1                                          | 3.122E-09 | 2.23E-08 | 3.75E-08 | 6.349E-07 | 3.383E-08 | 1.79E-07 |
| Q00839 | Heterogeneous nuclear ribonucleoprotein U                       | 1.546E-07 | 2.9E-06  | 5.86E-07 | 6.314E-06 | 1.943E-07 | 7.3E-06  |
| Q02878 | 60S ribosomal protein L6                                        | 1.435E-08 | 5.36E-08 |          |           |           |          |
| Q02880 | DNA topoisomerase 2-beta                                        | 6.495E-07 | 5.43E-06 | 9.57E-07 | 0.0000113 | 4.146E-07 | 1.17E-05 |
| Q02978 | Mitochondrial 2-oxoglutarate/malate carrier protein             | 1.07E-07  | 8.63E-08 |          |           |           |          |
| Q03252 | Lamin-B2                                                        |           | 5.19E-08 | 1.68E-06 | 1.815E-05 | 1.298E-07 | 1.27E-05 |



|        |                                                                   |           |          |          |           |           |          |
|--------|-------------------------------------------------------------------|-----------|----------|----------|-----------|-----------|----------|
| Q92841 | Probable ATP-dependent RNA helicase DDX17                         |           | 4.28E-07 | 3.64E-07 | 1.372E-06 | 1.467E-07 | 2.01E-06 |
| Q96D09 | G-protein coupled receptor-associated sorting protein 2           | 4.305E-08 |          | 5.52E-07 |           | 4.177E-07 |          |
| Q96EY1 | DnaJ homolog subfamily A member 3, mitochondrial                  | 7.543E-08 |          | 3.38E-07 | 1.308E-07 | 1.983E-07 |          |
| Q96HN2 | Putative adenosylhomocysteinase 3                                 | 4.207E-07 |          | 9.01E-08 |           | 1.781E-07 |          |
| Q96PK6 | RNA-binding protein 14                                            |           | 7.27E-07 |          | 9.445E-07 | 9.455E-09 | 3.97E-07 |
| Q96RQ3 | Methylcrotonoyl-CoA carboxylase subunit alpha, mitochondrial      | 1.628E-06 | 7.89E-06 | 4.86E-07 | 4.008E-06 | 3.966E-07 | 4.34E-06 |
| Q99623 | Prohibitin-2                                                      | 2.172E-08 | 7.06E-08 | 9.47E-07 | 4.115E-06 | 5.857E-07 | 1.99E-06 |
| Q99832 | T-complex protein 1 subunit eta                                   | 1.115E-06 |          | 1.13E-06 |           | 1.045E-06 |          |
| Q9BQ70 | Transcription factor 25                                           | 1.839E-08 |          | 4.24E-07 |           | 7.565E-08 |          |
| Q9BQE3 | Tubulin alpha-1C chain                                            | 3.596E-07 | 1.45E-07 | 2.26E-07 | 2.114E-08 | 2.128E-07 |          |
| Q9BVA1 | Tubulin beta-2B chain                                             | 3.498E-08 |          | 3.42E-07 | 4.799E-08 | 7.389E-07 |          |
| Q9BY77 | Polymerase delta-interacting protein 3                            |           | 1.06E-06 | 2.17E-07 | 2.322E-06 | 1.89E-07  | 1.12E-06 |
| Q9H0S4 | Probable ATP-dependent RNA helicase DDX47                         |           | 2.91E-08 | 3.58E-07 | 2.855E-06 |           | 3.28E-06 |
| Q9HAV7 | GrpE protein homolog 1, mitochondrial                             |           | 5.63E-06 | 1.35E-06 | 1.423E-05 | 9.459E-07 | 7.06E-06 |
| Q9HCC0 | Methylcrotonoyl-CoA carboxylase beta chain, mitochondrial         | 5.077E-06 | 1.25E-05 | 2.21E-06 | 0.0000157 | 1.192E-06 | 1.78E-05 |
| Q9HCD5 | Nuclear receptor coactivator 5                                    | 1.177E-07 | 1.17E-06 | 6.66E-07 | 5.527E-06 | 4.8E-07   | 7.83E-06 |
| Q9NW64 | Pre-mRNA-splicing factor RBM22                                    |           | 2.18E-08 |          |           |           |          |
| Q9NZI8 | Insulin-like growth factor 2 mRNA-binding protein 1               | 4.228E-08 | 1.05E-06 | 3.39E-07 | 2.354E-06 | 2.097E-07 | 9.54E-07 |
| Q9UJS0 | Calcium-binding mitochondrial carrier protein Aralar2             | 3.475E-08 |          | 2.28E-07 |           | 2.774E-07 |          |
| Q9UKD2 | mRNA turnover protein 4 homolog                                   |           | 1.84E-06 | 1.34E-06 | 1.101E-05 |           | 1.88E-05 |
| S4R3H4 | Apoptotic chromatin condensation inducer in the nucleus           | 2.892E-08 | 9.73E-08 | 2.6E-07  | 1.559E-06 | 2.091E-08 | 1.95E-06 |
| Q9UNK9 | Protein angel homolog 1                                           | 6.009E-08 |          | 2.98E-07 |           | 1.953E-07 |          |
| Q9Y2A7 | Nck-associated protein 1                                          | 1.403E-07 | 6.24E-07 | 2.38E-07 | 1.653E-06 | 1.828E-07 | 7.03E-07 |
| Q9Y4B6 | Protein VPRBP                                                     | 7.165E-07 |          | 3.88E-07 |           | 2.13E-07  |          |
| Q9Y5A9 | YTH domain family protein 2                                       | 2.057E-08 |          | 3.13E-07 |           | 4.164E-07 |          |
| Q9Y5B9 | FACT complex subunit SPT16                                        | 3.639E-07 | 8.17E-06 | 1.44E-06 | 1.066E-05 | 1.251E-07 | 1.26E-05 |
| Q9Y5V3 | Melanoma-associated antigen D1                                    | 1.039E-06 |          | 6.92E-07 | 4.865E-09 | 5.203E-07 |          |
| D6R9P3 | Heterogeneous nuclear ribonucleoprotein A/B                       |           | 5.57E-07 | 6.49E-07 | 5.745E-06 | 4.07E-07  | 2.48E-06 |
| K7EII5 | Acetyl-CoA carboxylase 1 (Fragment)                               |           | 3.46E-06 |          |           |           |          |
| M2     | Influenza A/WSN/33 M2                                             |           |          | 3.83E-07 | 3.073E-06 | 9.249E-07 |          |
| A6NKZ8 | Putative tubulin beta chain-like protein ENSP00000290377          |           |          | 2.79E-07 |           | 2.254E-07 |          |
| B5ME19 | Eukaryotic translation initiation factor 3 subunit C-like protein |           |          | 6.18E-09 |           |           |          |
| O00148 | ATP-dependent RNA helicase DDX39A                                 |           |          |          | 5.513E-07 |           |          |
| O00165 | HCLS1-associated protein X-1                                      |           |          | 1.71E-06 | 4.655E-08 | 1.191E-07 |          |
| O00255 | Menin                                                             |           |          | 4.13E-08 | 9.9E-08   |           |          |
| O00422 | Histone deacetylase complex subunit SAP18                         |           |          | 8.71E-07 | 9.389E-06 |           | 6.92E-07 |
| O00425 | Insulin-like growth factor 2 mRNA-binding protein 3               |           |          | 3.14E-09 | 1.665E-07 | 3.558E-09 | 2.85E-07 |
| O00483 | NADH dehydrogenase [ubiquinone] 1 alpha subcomplex subunit 4      |           |          | 2.88E-07 | 2.021E-07 |           |          |
| O00541 | Pescadillo homolog                                                |           |          | 2.39E-08 | 1.337E-07 |           | 2.42E-07 |



|        |                                                                      |          |           |           |          |
|--------|----------------------------------------------------------------------|----------|-----------|-----------|----------|
| O15027 | Protein transport protein Sec16A                                     | 2.06E-08 |           | 7.747E-09 |          |
| O15160 | DNA-directed RNA polymerases I and III subunit RPAC1                 | 1.92E-08 |           |           |          |
| O15269 | Serine palmitoyltransferase 1                                        | 4.25E-08 |           |           |          |
| O15355 | Protein phosphatase 1G                                               | 2.64E-07 |           | 3.102E-07 |          |
| O15498 | Synaptobrevin homolog YKT6                                           | 1.08E-08 | 2.353E-07 |           |          |
| O43143 | Putative pre-mRNA-splicing factor ATP-dependent RNA helicase DHX15   | 1.82E-09 | 1.635E-07 | 1.096E-08 | 4.19E-07 |
| O43172 | U4/U6 small nuclear ribonucleoprotein Prp4                           |          | 5.767E-07 |           | 5.84E-07 |
| O43175 | D-3-phosphoglycerate dehydrogenase                                   | 3.92E-07 | 4.045E-07 | 1.844E-07 | 9.78E-08 |
| O43290 | U4/U6.U5 tri-snRNP-associated protein 1                              | 3.04E-08 | 1.932E-07 |           |          |
| O43347 | RNA-binding protein Musashi homolog 1                                |          | 8.315E-08 |           |          |
| O43395 | U4/U6 small nuclear ribonucleoprotein Prp3                           |          | 4.219E-07 |           |          |
| O43423 | Acidic leucine-rich nuclear phosphoprotein 32 family member C        | 4.5E-08  |           |           |          |
| O43719 | HIV Tat-specific factor 1                                            | 3.18E-08 | 5.483E-08 | 9.454E-08 |          |
| O43823 | A-kinase anchor protein 8                                            | 5.95E-08 |           | 5.817E-08 |          |
| O43837 | Isocitrate dehydrogenase [NAD] subunit beta, mitochondrial           | 1.11E-08 |           |           |          |
| O43913 | Origin recognition complex subunit 5                                 | 4.1E-08  | 1.157E-06 |           | 2.51E-06 |
| O43929 | Origin recognition complex subunit 4                                 | 5.62E-08 | 1.588E-06 |           | 8.73E-07 |
| O60264 | Sucrose nonfermenting protein 2 homolog                              |          | 8.765E-08 |           |          |
| O60832 | H/ACA ribonucleoprotein complex subunit 4                            | 2.98E-08 | 4.842E-07 |           | 7.52E-07 |
| O75152 | Zinc finger CCCH domain-containing protein 11A                       | 8.93E-09 | 5.989E-07 |           |          |
| O75400 | Pre-mRNA-processing factor 40 homolog A                              |          | 3.695E-07 | 4.749E-08 | 3.66E-08 |
| O75475 | PC4 and SFRS1-interacting protein                                    | 8.03E-07 | 6.455E-06 |           | 7.49E-06 |
| O75489 | NADH dehydrogenase [ubiquinone] iron-sulfur protein 3, mitochondrial | 2E-08    |           |           |          |
| O75494 | Serine/arginine-rich splicing factor 10                              | 3.3E-09  | 5.288E-07 |           |          |
| O75533 | Splicing factor 3B subunit 1                                         | 2.45E-08 | 1.105E-07 | 4.883E-08 | 2.77E-08 |
| O75746 | Calcium-binding mitochondrial carrier protein Aralar1                | 2.73E-09 |           | 2.195E-08 |          |
| O75964 | ATP synthase subunit g, mitochondrial                                | 3.95E-07 | 4.02E-07  |           |          |
| O94776 | Metastasis-associated protein MTA2                                   | 3.17E-08 |           |           |          |
| O94906 | Pre-mRNA-processing factor 6                                         | 2.33E-08 | 3.554E-07 | 3.315E-09 | 7.75E-08 |
| O95071 | E3 ubiquitin-protein ligase UBR5                                     | 4.85E-08 |           | 3.491E-08 |          |
| O95218 | Zinc finger Ran-binding domain-containing protein 2                  | 6E-08    | 2.317E-07 |           |          |
| O95232 | Luc7-like protein 3                                                  | 5E-08    | 3.586E-07 |           | 2.17E-07 |
| O95251 | Histone acetyltransferase KAT7                                       | 1.55E-08 | 1.127E-07 |           |          |
| O95758 | Polypyrimidine tract-binding protein 3                               |          | 6.314E-09 |           |          |
| O95816 | BAG family molecular chaperone regulator 2                           | 2.13E-06 |           | 8.646E-07 |          |
| O96019 | Actin-like protein 6A                                                | 4.08E-08 | 6.526E-07 |           |          |
| O96028 | Histone-lysine N-methyltransferase NSD2                              |          | 6.061E-08 |           |          |
| P00403 | Cytochrome c oxidase subunit 2                                       | 1.17E-07 |           |           |          |
| P02788 | Lactotransferrin                                                     |          | 1.591E-08 |           |          |

|        |                                                                          |          |           |           |          |  |
|--------|--------------------------------------------------------------------------|----------|-----------|-----------|----------|--|
| P04279 | Semenogelin-1                                                            |          | 6.794E-07 |           |          |  |
| P04350 | Tubulin beta-4A chain                                                    | 2.01E-07 | 9.934E-09 | 1.457E-07 |          |  |
| P04637 | Cellular tumor antigen p53                                               | 9.29E-08 | 6.293E-08 | 5.19E-08  | 3.86E-07 |  |
| P04843 | Dolichyl-diphosphooligosaccharide--protein glycosyltransferase subunit 1 | 2.73E-07 | 2.159E-06 | 3.556E-07 | 1.03E-06 |  |
| P04844 | Dolichyl-diphosphooligosaccharide--protein glycosyltransferase subunit 2 |          | 6.582E-08 |           |          |  |
| P05023 | Sodium/potassium-transporting ATPase subunit alpha-1                     | 1.06E-07 | 9.121E-08 | 7.52E-08  |          |  |
| P05114 | Non-histone chromosomal protein HMG-14                                   | 6E-08    | 8.679E-07 |           |          |  |
| P05204 | Non-histone chromosomal protein HMG-17                                   | 2.38E-07 | 7.085E-07 |           |          |  |
| P05388 | 60S acidic ribosomal protein P0                                          | 8.49E-07 | 5.277E-06 | 2.29E-07  | 2.14E-06 |  |
| P05455 | Lupus La protein                                                         | 1.26E-06 | 5.743E-07 | 8.024E-07 |          |  |
| P06576 | ATP synthase subunit beta, mitochondrial                                 | 6.86E-07 | 3.323E-06 | 4.081E-07 | 4.56E-06 |  |
| P06730 | Eukaryotic translation initiation factor 4E                              | 2.73E-07 |           | 3.59E-07  |          |  |
| P07237 | Protein disulfide-isomerase                                              | 4.04E-08 |           | 2.659E-08 |          |  |
| P07814 | Bifunctional glutamate/proline--tRNA ligase                              | 1.48E-08 | 1.002E-07 | 1.779E-08 |          |  |
| P07900 | Heat shock protein HSP 90-alpha                                          | 1.18E-07 | 4.903E-08 | 2.168E-07 |          |  |
| P07910 | Heterogeneous nuclear ribonucleoproteins C1/C2                           | 1.51E-07 | 1.465E-06 | 1.072E-07 | 4.39E-06 |  |
| P08238 | Heat shock protein HSP 90-beta                                           | 1.57E-07 | 1.269E-07 | 3.541E-08 | 1.95E-07 |  |
| P08579 | U2 small nuclear ribonucleoprotein B''                                   | 1.16E-07 | 1.78E-07  |           |          |  |
| P08621 | U1 small nuclear ribonucleoprotein 70 kDa                                | 1.26E-07 | 1.505E-06 | 1.179E-08 | 2.96E-06 |  |
| P08708 | 40S ribosomal protein S17                                                | 3.5E-07  | 1.93E-06  |           |          |  |
| P08865 | 40S ribosomal protein SA                                                 | 1.07E-06 | 2.197E-06 | 7.76E-07  | 7.57E-07 |  |
| P09012 | U1 small nuclear ribonucleoprotein A                                     | 9.43E-08 | 9.861E-07 |           | 1.19E-06 |  |
| P09622 | Dihydrolipoyl dehydrogenase, mitochondrial                               | 1.77E-09 | 7.967E-07 |           |          |  |
| P09661 | U2 small nuclear ribonucleoprotein A'                                    | 1.24E-07 | 6.538E-07 |           |          |  |
| P10644 | cAMP-dependent protein kinase type I-alpha regulatory subunit            | 6.78E-07 |           | 5.997E-07 |          |  |
| P11908 | Ribose-phosphate pyrophosphokinase 2                                     |          | 9.869E-08 |           |          |  |
| P11940 | Polyadenylate-binding protein 1                                          | 1.51E-07 | 1.012E-06 | 1.215E-07 | 3.96E-07 |  |
| P12268 | Inosine-5'-monophosphate dehydrogenase 2                                 | 1.04E-07 | 3.762E-07 |           |          |  |
| P12273 | Prolactin-inducible protein                                              | 2.14E-08 | 1.966E-06 | 3.369E-08 | 1.45E-06 |  |
| P13489 | Ribonuclease inhibitor                                                   | 4.45E-08 |           |           |          |  |
| P13639 | Elongation factor 2                                                      | 3.56E-09 | 4.602E-08 | 3.288E-09 |          |  |
| P13674 | Prolyl 4-hydroxylase subunit alpha-1                                     | 3.42E-07 |           | 2.42E-07  |          |  |
| P14868 | Aspartate--tRNA ligase, cytoplasmic                                      | 4.08E-08 | 1.512E-07 |           |          |  |
| P14923 | Junction plakoglobin                                                     | 1.82E-08 | 6.764E-08 | 7.536E-08 | 8.97E-07 |  |
| P15924 | Desmoplakin                                                              | 5.17E-09 | 2.436E-08 | 6.8E-08   | 5.79E-07 |  |
| P15927 | Replication protein A 32 kDa subunit                                     | 2.13E-08 | 7.411E-07 |           | 3.81E-07 |  |
| P16615 | Sarcoplasmic/endoplasmic reticulum calcium ATPase 2                      | 4.76E-08 | 1.541E-07 | 2.144E-08 |          |  |
| P16989 | Y-box-binding protein 3                                                  | 9.62E-08 | 1.612E-07 | 5.322E-08 |          |  |
| P17096 | High mobility group protein HMG-I/HMG-Y                                  | 2.64E-07 | 1.028E-06 |           |          |  |

|        |                                                                           |          |           |           |          |
|--------|---------------------------------------------------------------------------|----------|-----------|-----------|----------|
| P18085 | ADP-ribosylation factor 4                                                 | 1.14E-07 | 4.51E-07  |           |          |
| P18754 | Regulator of chromosome condensation                                      | 6.99E-07 | 6.081E-06 |           | 6.5E-06  |
| P21796 | Voltage-dependent anion-selective channel protein 1                       | 6.26E-07 | 3.757E-06 | 4.952E-07 | 2.65E-06 |
| P22695 | Cytochrome b-c1 complex subunit 2, mitochondrial                          | 2.36E-08 | 6.593E-08 |           |          |
| P23284 | Peptidyl-prolyl cis-trans isomerase B                                     | 3.65E-07 |           |           |          |
| P24539 | ATP synthase F(0) complex subunit B1, mitochondrial                       | 4.32E-08 | 7.921E-07 | 1.475E-07 |          |
| P25398 | 40S ribosomal protein S12                                                 | 5.74E-08 |           |           |          |
| P25686 | DnaJ homolog subfamily B member 2                                         | 2.41E-08 |           |           |          |
| P25705 | ATP synthase subunit alpha, mitochondrial                                 | 1.08E-06 | 6.711E-06 | 1.457E-06 | 6.3E-06  |
| P27348 | 14-3-3 protein theta                                                      |          | 1.024E-07 |           |          |
| P27635 | 60S ribosomal protein L10                                                 | 5.1E-07  | 4.012E-07 | 2.432E-07 |          |
| P27694 | Replication protein A 70 kDa DNA-binding subunit                          | 2.18E-07 | 2.259E-06 | 2.799E-08 | 2.93E-06 |
| P27816 | Microtubule-associated protein 4                                          | 6.03E-09 | 2.516E-08 |           |          |
| P27824 | Calnexin                                                                  | 5.21E-08 | 1.271E-07 |           |          |
| P28288 | ATP-binding cassette sub-family D member 3                                |          | 4.642E-07 |           |          |
| P30153 | Serine/threonine-protein phosphatase 2A 65 kDa regulatory subunit A alpha | 5.7E-08  |           |           |          |
| P30876 | DNA-directed RNA polymerase II subunit RPB2                               | 4.85E-08 |           | 2.319E-08 |          |
| P31040 | Succinate dehydrogenase [ubiquinone] flavoprotein subunit, mitochondrial  | 9.39E-08 |           | 1.288E-07 |          |
| P31350 | Ribonucleoside-diphosphate reductase subunit M2                           | 9.67E-08 | 1.367E-06 |           |          |
| P31483 | Nucleolysin TIA-1 isoform p40                                             |          | 6.545E-07 |           |          |
| P35232 | Prohibitin                                                                | 6.22E-07 | 2.736E-06 | 4.122E-07 |          |
| P35637 | RNA-binding protein FUS                                                   | 2.43E-07 | 1.541E-06 |           | 1.45E-06 |
| P36507 | Dual specificity mitogen-activated protein kinase kinase 2                | 1.17E-07 | 2.635E-07 | 4.309E-08 |          |
| P36542 | ATP synthase subunit gamma, mitochondrial                                 | 4.82E-07 | 2.393E-07 | 2.332E-07 | 1.34E-06 |
| P36873 | Serine/threonine-protein phosphatase PP1-gamma catalytic subunit          | 2.05E-07 | 1.714E-06 | 7.23E-08  | 1.58E-06 |
| P36957 | 2-oxoglutarate dehydrogenase complex component E2                         | 1.09E-07 | 1.646E-06 | 1.604E-07 | 1.24E-07 |
| P37108 | Signal recognition particle 14 kDa protein                                | 2.01E-07 | 5.42E-06  |           | 2.93E-06 |
| P39019 | 40S ribosomal protein S19                                                 | 4.01E-06 | 6.963E-06 | 1.256E-06 | 3.55E-06 |
| P41252 | Isoleucine--tRNA ligase, cytoplasmic                                      |          | 6.934E-09 |           |          |
| P42167 | Lamina-associated polypeptide 2, isoforms beta/gamma                      | 1.41E-06 | 0.0000112 | 6.069E-08 | 7.23E-06 |
| P43694 | Transcription factor GATA-4                                               | 1.33E-08 | 1.063E-07 |           |          |
| P45973 | Chromobox protein homolog 5                                               |          | 2.91E-07  |           |          |
| P46060 | Ran GTPase-activating protein 1                                           |          | 1.075E-07 |           |          |
| P46776 | 60S ribosomal protein L27a                                                | 2.76E-07 | 2.963E-07 | 1.846E-07 | 9.2E-07  |
| P46777 | 60S ribosomal protein L5                                                  | 1.33E-07 | 7.037E-06 | 3.549E-09 | 6.22E-06 |
| P46782 | 40S ribosomal protein S5                                                  | 2.04E-06 | 6.638E-06 | 3.537E-07 | 9.86E-07 |
| P46783 | 40S ribosomal protein S10                                                 | 1.7E-06  | 4.806E-06 | 4.198E-06 | 4.67E-06 |
| P48047 | ATP synthase subunit O, mitochondrial                                     | 4.03E-07 | 2.656E-06 | 1.844E-07 | 6.96E-07 |
| P49327 | Fatty acid synthase                                                       | 3.93E-09 |           |           |          |

|        |                                                                  |          |           |           |          |
|--------|------------------------------------------------------------------|----------|-----------|-----------|----------|
| P49756 | RNA-binding protein 25                                           | 2.11E-08 | 8.835E-07 | 6.296E-08 | 2.65E-07 |
| P49790 | Nuclear pore complex protein Nup153                              | 1.15E-08 |           |           |          |
| P50990 | T-complex protein 1 subunit theta                                | 9.29E-07 | 3.48E-08  | 1.104E-06 |          |
| P51532 | Transcription activator BRG1                                     | 2.04E-08 | 9.361E-08 |           | 1.85E-07 |
| P51659 | Peroxisomal multifunctional enzyme type 2                        | 4.1E-08  | 2.872E-07 |           |          |
| P52701 | DNA mismatch repair protein Msh6                                 | 5.67E-08 | 1.329E-07 | 5.837E-08 |          |
| P52907 | F-actin-capping protein subunit alpha-1                          | 1.07E-07 | 8.98E-08  | 4.626E-08 |          |
| P52926 | High mobility group protein HMGI-C                               | 1.65E-08 | 1.573E-07 |           |          |
| P54886 | Delta-1-pyrroline-5-carboxylate synthase                         | 4.39E-07 | 1.084E-07 | 3.333E-07 |          |
| P55209 | Nucleosome assembly protein 1-like 1                             | 1.83E-07 | 2.191E-08 |           |          |
| P55265 | Double-stranded RNA-specific adenosine deaminase                 | 1.32E-08 | 1.18E-07  |           | 1.73E-07 |
| P55316 | Forkhead box protein G1                                          |          | 6.953E-08 |           |          |
| P55795 | Heterogeneous nuclear ribonucleoprotein H2                       | 7.36E-09 | 2.861E-07 |           |          |
| P56270 | Myc-associated zinc finger protein                               |          | 1.402E-07 |           |          |
| P57740 | Nuclear pore complex protein Nup107                              | 2.52E-08 |           | 4.199E-08 |          |
| P60866 | 40S ribosomal protein S20                                        | 2.14E-06 | 5.186E-06 | 5.676E-07 | 4.55E-06 |
| P60891 | Ribose-phosphate pyrophosphokinase 1                             | 4.75E-08 | 1.518E-07 | 9.088E-08 |          |
| P61081 | NEDD8-conjugating enzyme Ubc12                                   | 3.34E-08 | 9.183E-07 |           |          |
| P61254 | 60S ribosomal protein L26                                        | 1.07E-07 | 1.499E-06 | 3.495E-07 | 2.81E-06 |
| P61964 | WD repeat-containing protein 5                                   | 2.08E-08 |           |           |          |
| P61978 | Heterogeneous nuclear ribonucleoprotein K                        | 1.73E-06 | 2.494E-06 | 4.042E-07 | 3.5E-06  |
| P62136 | Serine/threonine-protein phosphatase PP1-alpha catalytic subunit | 6.68E-08 | 2.666E-06 | 1.375E-09 | 4.17E-07 |
| P62195 | 26S protease regulatory subunit 8                                | 1.12E-07 | 2.071E-08 |           |          |
| P62258 | 14-3-3 protein epsilon                                           | 2.86E-07 | 6.632E-08 |           |          |
| P62269 | 40S ribosomal protein S18                                        | 2.66E-06 | 8.364E-06 | 1.591E-06 | 8.11E-07 |
| P62304 | Small nuclear ribonucleoprotein E                                | 1.57E-07 | 3.008E-07 | 2.167E-07 | 2.26E-06 |
| P62306 | Small nuclear ribonucleoprotein F                                | 3.29E-07 | 2.511E-07 |           |          |
| P62316 | Small nuclear ribonucleoprotein Sm D2                            | 1.74E-06 | 1.464E-05 | 3.655E-07 | 7.15E-06 |
| P62318 | Small nuclear ribonucleoprotein Sm D3                            | 2E-07    |           | 1.855E-07 | 3.98E-06 |
| P62424 | 60S ribosomal protein L7a                                        |          | 2.878E-07 |           |          |
| P62750 | 60S ribosomal protein L23a                                       | 4.5E-07  | 3.194E-06 | 3.362E-07 | 3.7E-06  |
| P62826 | GTP-binding nuclear protein Ran                                  | 8.72E-07 | 5.695E-06 | 5.849E-08 | 7.1E-06  |
| P62851 | 40S ribosomal protein S25                                        | 1.44E-06 | 2.982E-06 | 1.273E-06 | 2.19E-06 |
| P62857 | 40S ribosomal protein S28                                        | 4.04E-07 |           | 9.335E-07 |          |
| P62888 | 60S ribosomal protein L30                                        | 6.12E-08 | 0.0000047 | 1.527E-08 | 1.18E-06 |
| P62979 | Ubiquitin-40S ribosomal protein S27a                             | 1.13E-07 | 3.086E-07 | 4.594E-06 | 1.24E-06 |
| P63104 | 14-3-3 protein zeta/delta                                        | 1.58E-08 |           | 8.154E-08 |          |
| P78371 | T-complex protein 1 subunit beta                                 | 8.53E-07 | 7.572E-07 | 7.676E-07 | 1.29E-07 |
| P78549 | Endonuclease III-like protein 1                                  |          | 2.707E-07 |           |          |

|        |                                                                      |          |           |           |          |
|--------|----------------------------------------------------------------------|----------|-----------|-----------|----------|
| Q00059 | Transcription factor A, mitochondrial                                | 2.36E-07 | 1.339E-06 |           | 8.62E-07 |
| Q00587 | Cdc42 effector protein 1                                             | 1.55E-07 |           | 7.523E-08 |          |
| Q01081 | Splicing factor U2AF 35 kDa subunit                                  | 2.69E-07 | 3.155E-06 |           | 2.12E-06 |
| Q01105 | Protein SET                                                          | 3.48E-07 | 2.516E-06 | 3.531E-07 | 1.38E-06 |
| Q01130 | Serine/arginine-rich splicing factor 2                               | 2.27E-08 | 1.465E-06 |           |          |
| Q02218 | 2-oxoglutarate dehydrogenase, mitochondrial                          | 2.41E-08 | 2.202E-08 |           |          |
| Q02447 | Transcription factor Sp3                                             |          | 1.087E-07 |           |          |
| Q04837 | Single-stranded DNA-binding protein, mitochondrial                   | 5.55E-07 | 1.204E-06 |           |          |
| Q04917 | 14-3-3 protein eta                                                   | 1.6E-07  |           |           |          |
| Q05D32 | CTD small phosphatase-like protein 2                                 |          | 1.357E-07 |           |          |
| Q07021 | Complement component 1 Q subcomponent-binding protein, mitochondrial | 1.15E-06 | 2.33E-06  | 3.884E-07 | 1.46E-06 |
| Q07065 | Cytoskeleton-associated protein 4                                    | 8.93E-08 | 6.701E-08 |           |          |
| Q08170 | Serine/arginine-rich splicing factor 4                               | 3.69E-08 | 5.625E-07 |           | 2.14E-07 |
| Q09028 | Histone-binding protein RBBP4                                        | 2.11E-08 | 3.186E-07 |           | 5.31E-07 |
| Q12788 | Transducin beta-like protein 3                                       |          | 6.979E-08 |           |          |
| Q12874 | Splicing factor 3A subunit 3                                         | 5.79E-08 | 2.828E-07 |           |          |
| Q13011 | Delta(3,5)-Delta(2,4)-dienoyl-CoA isomerase, mitochondrial           | 1.78E-08 | 8.838E-07 |           |          |
| Q13112 | Chromatin assembly factor 1 subunit B                                | 2.5E-08  | 1.093E-07 |           | 5.89E-07 |
| Q13148 | TAR DNA-binding protein 43                                           | 5.25E-07 | 4.395E-06 | 8.169E-08 | 3.52E-06 |
| Q13185 | Chromobox protein homolog 3                                          | 1.69E-08 | 2.557E-07 |           |          |
| Q13242 | Serine/arginine-rich splicing factor 9                               | 3.53E-07 | 2.594E-06 |           | 4.87E-07 |
| Q13243 | Serine/arginine-rich splicing factor 5                               | 3.13E-08 | 1.841E-07 |           |          |
| Q13247 | Serine/arginine-rich splicing factor 6                               | 1.63E-07 | 3.412E-06 |           | 2.08E-06 |
| Q13257 | Mitotic spindle assembly checkpoint protein MAD2A                    | 3.46E-07 | 4.126E-07 | 4.155E-07 |          |
| Q13330 | Metastasis-associated protein MTA1                                   | 2.3E-08  | 1.278E-07 |           |          |
| Q13415 | Origin recognition complex subunit 1                                 | 2.41E-08 | 3.287E-07 |           | 2.67E-07 |
| Q13416 | Origin recognition complex subunit 2                                 | 5.18E-08 | 1.185E-06 |           | 1.23E-06 |
| Q13435 | Splicing factor 3B subunit 2                                         | 1.36E-08 | 5.607E-08 |           |          |
| Q13595 | Transformer-2 protein homolog alpha                                  | 9.44E-09 | 5.843E-07 |           | 6.72E-07 |
| Q13617 | Cullin-2                                                             | 2.21E-08 | 1.302E-07 |           |          |
| Q13620 | Cullin-4B                                                            | 7.14E-08 | 1.669E-07 |           |          |
| Q13885 | Tubulin beta-2A chain                                                | 2.9E-07  |           | 6.402E-08 |          |
| Q14011 | Cold-inducible RNA-binding protein                                   | 1.8E-07  | 7.726E-07 |           | 7.71E-07 |
| Q14151 | Scaffold attachment factor B2                                        | 2.31E-08 | 5.093E-07 | 2.165E-08 | 3.6E-07  |
| Q14157 | Ubiquitin-associated protein 2-like                                  | 9.74E-08 | 5.312E-08 | 6.709E-09 |          |
| Q14204 | Cytoplasmic dynein 1 heavy chain 1                                   | 8.65E-09 | 5.191E-08 |           |          |
| Q14444 | Caprin-1                                                             |          | 1.645E-07 |           |          |
| Q14498 | RNA-binding protein 39                                               | 1.59E-07 | 5.575E-07 | 1.036E-07 | 4.36E-07 |
| Q14669 | E3 ubiquitin-protein ligase TRIP12                                   |          | 2.235E-08 |           |          |

|        |                                                               |          |           |           |          |
|--------|---------------------------------------------------------------|----------|-----------|-----------|----------|
| Q14677 | Clathrin interactor 1                                         | 4.11E-08 |           | 4.848E-08 |          |
| Q14739 | Lamin-B receptor                                              | 1.49E-08 |           |           |          |
| Q14807 | Kinesin-like protein KIF22                                    |          | 2.933E-07 |           |          |
| Q14839 | Chromodomain-helicase-DNA-binding protein 4                   |          | 3.581E-08 |           |          |
| Q14978 | Nucleolar and coiled-body phosphoprotein 1                    | 5.27E-07 | 5.996E-06 | 1.313E-07 | 3.34E-06 |
| Q15007 | Pre-mRNA-splicing regulator WTAP                              | 2.63E-08 | 1.275E-07 |           |          |
| Q15029 | 116 kDa U5 small nuclear ribonucleoprotein component          | 1.92E-08 | 2.557E-07 | 2.285E-08 | 1.15E-08 |
| Q15365 | Poly(rC)-binding protein 1                                    | 2.38E-07 | 1.004E-06 | 1.768E-07 | 8E-07    |
| Q15459 | Splicing factor 3A subunit 1                                  | 2.26E-08 | 1.587E-07 | 2.577E-08 |          |
| Q16630 | Cleavage and polyadenylation specificity factor subunit 6     |          | 1.054E-07 |           |          |
| Q16775 | Hydroxyacylglutathione hydrolase, mitochondrial               | 1.75E-07 | 3.135E-06 | 1.273E-07 | 4.69E-07 |
| Q27J81 | Inverted formin-2                                             | 1.83E-08 | 7.853E-08 |           |          |
| Q2NKX8 | DNA excision repair protein ERCC-6-like                       | 2.18E-08 |           |           |          |
| Q2TAY7 | WD40 repeat-containing protein SMU1                           |          | 1.14E-07  |           | 4.65E-07 |
| Q3ZCQ8 | Mitochondrial import inner membrane translocase subunit TIM50 | 2.98E-07 | 1.968E-08 | 1.503E-07 |          |
| Q53GQ0 | Estradiol 17-beta-dehydrogenase 12                            | 1.05E-08 | 2.4E-07   |           |          |
| Q53GS9 | U4/U6.U5 tri-snRNP-associated protein 2                       | 9.86E-09 | 5.566E-07 |           | 5.36E-07 |
| Q562R1 | Beta-actin-like protein 2                                     |          | 3.391E-07 |           |          |
| Q5JTV8 | Torsin-1A-interacting protein 1                               | 7.07E-09 | 1.712E-08 |           |          |
| Q5SW79 | Centrosomal protein of 170 kDa                                | 1.82E-08 |           | 1.677E-08 |          |
| Q5T4S7 | E3 ubiquitin-protein ligase UBR4                              | 7.53E-09 | 1.806E-08 |           |          |
| Q5T8P6 | RNA-binding protein 26                                        |          | 5.624E-08 |           |          |
| Q5UIP0 | Telomere-associated protein RIF1                              | 7.99E-08 | 6.731E-07 |           | 7.5E-07  |
| Q5W0B1 | RING finger protein 219                                       | 5.89E-07 |           | 4.759E-07 |          |
| Q6P1J9 | Parafibromin                                                  | 2.08E-08 | 3.689E-08 |           |          |
| Q6P2Q9 | Pre-mRNA-processing-splicing factor 8                         | 7.76E-10 | 9.625E-08 |           |          |
| Q6PJT7 | Zinc finger CCCH domain-containing protein 14                 | 1.12E-07 | 6.978E-07 |           |          |
| Q6R327 | Rapamycin-insensitive companion of mTOR                       | 3.57E-08 |           | 1.169E-08 |          |
| Q6YN16 | Hydroxysteroid dehydrogenase-like protein 2                   | 5.01E-08 | 1.545E-07 | 1.088E-07 |          |
| Q7Z4H7 | HAUS augmin-like complex subunit 6                            | 9.07E-08 |           | 1.667E-07 |          |
| Q7Z739 | YTH domain family protein 3                                   |          | 4.819E-08 | 3.372E-08 |          |
| Q86U42 | Polyadenylate-binding protein 2                               | 8.07E-07 | 1.201E-05 | 1.271E-06 | 1.87E-05 |
| Q86UA1 | Pre-mRNA-processing factor 39                                 | 1.93E-08 | 6.753E-08 |           |          |
| Q86UY6 | N-alpha-acetyltransferase 40                                  |          | 4.835E-07 |           |          |
| Q86V15 | Zinc finger protein castor homolog 1                          | 1.66E-09 | 2.931E-08 |           |          |
| Q86YP4 | Transcriptional repressor p66-alpha                           |          | 1.223E-07 |           |          |
| Q8IWS0 | PHD finger protein 6                                          | 1.03E-08 | 6.008E-08 |           |          |
| Q8N1F7 | Nuclear pore complex protein Nup93                            | 7.09E-08 | 5.778E-07 | 7.658E-08 | 1.96E-07 |
| Q8N5D0 | WD and tetratricopeptide repeats protein 1                    | 2.86E-08 | 3.593E-08 | 3.464E-08 |          |

|        |                                                             |          |           |           |          |
|--------|-------------------------------------------------------------|----------|-----------|-----------|----------|
| Q8NC51 | Plasminogen activator inhibitor 1 RNA-binding protein       | 5.26E-08 | 7.955E-08 | 5.39E-08  | 2.94E-07 |
| Q8NCA5 | Protein FAM98A                                              |          | 3.672E-07 |           | 1.05E-06 |
| Q8NDX6 | Zinc finger protein 740                                     |          | 9.611E-07 |           |          |
| Q8NF91 | Nesprin-1                                                   |          | 5.408E-09 |           |          |
| Q8NFH5 | Nucleoporin NUP53                                           | 7.17E-08 | 4.111E-08 |           |          |
| Q8WV44 | E3 ubiquitin-protein ligase TRIM41                          | 4.76E-08 |           | 3.972E-08 |          |
| Q8WWY3 | U4/U6 small nuclear ribonucleoprotein Prp31                 |          | 7.305E-08 |           |          |
| Q8WXF1 | Paraspeckle component 1                                     |          | 5.068E-08 |           |          |
| Q8WXI9 | Transcriptional repressor p66-beta                          |          | 1.867E-07 |           |          |
| Q92552 | 28S ribosomal protein S27, mitochondrial                    | 2.37E-08 |           |           |          |
| Q92598 | Heat shock protein 105 kDa                                  | 2.81E-08 | 2.348E-08 |           |          |
| Q92621 | Nuclear pore complex protein Nup205                         |          | 1.499E-08 |           |          |
| Q92769 | Histone deacetylase 2                                       |          | 3.859E-07 |           |          |
| Q92785 | Zinc finger protein ubi-d4                                  |          | 3.216E-07 |           |          |
| Q92879 | CUGBP Elav-like family member 1                             | 3.68E-08 | 1.928E-07 |           | 1.06E-06 |
| Q92922 | SWI/SNF complex subunit SMARCC1                             |          | 1.266E-07 |           | 1.04E-07 |
| Q92945 | Far upstream element-binding protein 2                      | 5.47E-08 |           |           |          |
| Q92979 | Ribosomal RNA small subunit methyltransferase NEP1          | 2.96E-07 | 6.958E-06 |           | 9.44E-06 |
| Q93008 | Probable ubiquitin carboxyl-terminal hydrolase FAF-X        | 5.86E-08 |           | 3.949E-08 |          |
| Q93034 | Cullin-5                                                    | 1.35E-07 | 1.479E-06 | 2.37E-07  | 6.62E-07 |
| Q96AG4 | Leucine-rich repeat-containing protein 59                   | 6.21E-08 | 4.163E-08 |           |          |
| Q96C36 | Pyrroline-5-carboxylate reductase 2                         | 2.31E-08 | 2.029E-07 |           |          |
| Q96DF8 | Protein DGCR14                                              | 7.72E-08 |           |           |          |
| Q96EB6 | NAD-dependent protein deacetylase sirtuin-1                 | 1.34E-08 |           |           |          |
| Q96GA3 | Protein LTV1 homolog                                        | 5.26E-09 |           |           |          |
| Q96GX5 | Serine/threonine-protein kinase greatwall                   | 1.13E-08 |           |           |          |
| Q96P16 | Regulation of nuclear pre-mRNA domain-containing protein 1A | 1.71E-08 | 1.498E-07 |           |          |
| Q96S55 | ATPase WRNIP1                                               | 2.09E-08 |           | 3.265E-08 |          |
| Q96ST2 | Protein IWS1 homolog                                        | 6.34E-08 | 4.074E-07 |           | 9.32E-07 |
| Q96T37 | Putative RNA-binding protein 15                             | 1.29E-08 | 1.82E-07  |           | 1.35E-07 |
| Q96T58 | Msx2-interacting protein                                    |          | 1.884E-08 |           |          |
| Q96T88 | E3 ubiquitin-protein ligase UHRF1                           | 2.05E-08 | 7.668E-07 |           | 3.02E-07 |
| Q99459 | Cell division cycle 5-like protein                          | 1.8E-09  | 2.631E-07 |           |          |
| Q99615 | DnaJ homolog subfamily C member 7                           | 1.53E-07 |           | 5.882E-08 |          |
| Q99986 | Serine/threonine-protein kinase VRK1                        |          | 5.031E-07 |           | 9.98E-07 |
| Q9BQ67 | Glutamate-rich WD repeat-containing protein 1               | 1.06E-08 | 3.194E-07 |           |          |
| Q9BQG0 | Myb-binding protein 1A                                      | 2.85E-09 | 1.751E-08 |           | 1.87E-07 |
| Q9BSJ8 | Extended synaptotagmin-1                                    | 3.6E-09  |           |           |          |
| Q9BUF5 | Tubulin beta-6 chain                                        | 6.63E-07 | 9.413E-08 | 4.983E-07 |          |

|        |                                                                         |          |           |           |          |
|--------|-------------------------------------------------------------------------|----------|-----------|-----------|----------|
| Q9BUJ2 | Heterogeneous nuclear ribonucleoprotein U-like protein 1                | 5.35E-08 | 8.987E-08 | 1.339E-08 |          |
| Q9BUQ8 | Probable ATP-dependent RNA helicase DDX23                               | 3.51E-08 | 9.544E-09 |           | 2.35E-07 |
| Q9BW61 | DET1- and DDB1-associated protein 1                                     | 2.91E-07 |           |           |          |
| Q9BWF3 | RNA-binding protein 4                                                   | 1.87E-08 | 8.548E-07 |           | 1.5E-07  |
| Q9BXP5 | Serrate RNA effector molecule homolog                                   | 9.25E-08 | 1.315E-07 |           |          |
| Q9BXW9 | Fanconi anemia group D2 protein                                         | 6.64E-09 |           |           |          |
| Q9BZC1 | CUGBP Elav-like family member 4                                         |          | 4.329E-07 |           |          |
| Q9BZE1 | 39S ribosomal protein L37, mitochondrial                                | 4.25E-08 | 8.13E-08  |           |          |
| Q9GZZ9 | Ubiquitin-like modifier-activating enzyme 5                             | 1.06E-07 |           | 3.488E-08 |          |
| Q9H078 | Caseinolytic peptidase B protein homolog                                | 3.81E-07 | 2.696E-07 | 2.951E-07 |          |
| Q9H0A0 | N-acetyltransferase 10                                                  | 3.58E-09 | 1.492E-08 |           |          |
| Q9H307 | Pinin                                                                   | 3.33E-08 | 4.03E-07  |           |          |
| Q9H3P2 | Negative elongation factor A                                            |          | 9.331E-08 |           |          |
| Q9H9A6 | Leucine-rich repeat-containing protein 40                               | 4.97E-07 |           | 7.5E-07   |          |
| Q9HCN4 | GPN-loop GTPase 1                                                       | 1.42E-07 | 9.577E-08 |           |          |
| Q9NQ29 | Putative RNA-binding protein Luc7-like 1                                | 5.04E-08 | 9.049E-08 |           |          |
| Q9NRG9 | Aladin                                                                  |          | 1.363E-07 |           |          |
| Q9NRZ9 | Lymphoid-specific helicase                                              | 6.87E-08 |           |           |          |
| Q9NS69 | Mitochondrial import receptor subunit TOM22 homolog                     | 2.75E-07 |           |           |          |
| Q9NSI2 | Protein FAM207A                                                         | 3.74E-08 | 9.238E-07 |           |          |
| Q9NTI5 | Sister chromatid cohesion protein PDS5 homolog B                        | 8.85E-09 | 2.49E-08  |           |          |
| Q9NUU7 | ATP-dependent RNA helicase DDX19A                                       | 5.55E-08 | 1.681E-07 |           |          |
| Q9NVH2 | Integrator complex subunit 7                                            |          | 2.685E-08 |           |          |
| Q9NVI7 | ATPase family AAA domain-containing protein 3A                          | 1.37E-07 | 3.034E-07 | 1.005E-07 |          |
| Q9NXW2 | DnaJ homolog subfamily B member 12                                      | 8.88E-08 |           |           |          |
| Q9NYF8 | Bcl-2-associated transcription factor 1                                 | 1.88E-08 | 1.996E-07 |           |          |
| Q9NZB2 | Constitutive coactivator of PPAR-gamma-like protein 1                   | 6.74E-09 | 6.685E-08 |           |          |
| Q9P035 | Very-long-chain (3R)-3-hydroxyacyl-[acyl-carrier protein] dehydratase 3 | 8.52E-09 | 2.894E-07 |           |          |
| Q9P2D1 | Chromodomain-helicase-DNA-binding protein 7                             | 1.3E-09  | 4.677E-08 |           |          |
| Q9UBD5 | Origin recognition complex subunit 3                                    | 1.47E-08 | 9.177E-07 |           | 1.01E-06 |
| Q9UBU9 | Nuclear RNA export factor 1                                             | 3.79E-08 | 2.26E-07  |           |          |
| Q9UFC0 | Leucine-rich repeat and WD repeat-containing protein 1                  | 1.92E-08 | 1.115E-06 |           | 4.62E-07 |
| Q9UG63 | ATP-binding cassette sub-family F member 2                              | 3.51E-08 |           |           |          |
| Q9UHX1 | Poly(U)-binding-splicing factor PUF60                                   | 5.42E-08 | 8.64E-07  | 1.774E-08 | 3.43E-07 |
| Q9UJV9 | Probable ATP-dependent RNA helicase DDX41                               | 1.42E-08 | 6.601E-08 |           |          |
| Q9UJZ1 | Stomatin-like protein 2, mitochondrial                                  | 9.13E-08 | 1.27E-07  |           |          |
| Q9UKA9 | Polypyrimidine tract-binding protein 2                                  | 2.07E-08 | 3.814E-08 |           |          |
| Q9UL15 | BAG family molecular chaperone regulator 5                              | 3.02E-08 |           |           |          |
| Q9ULT8 | E3 ubiquitin-protein ligase HECTD1                                      | 6.44E-09 |           |           |          |



|        |                                                             |          |           |           |          |
|--------|-------------------------------------------------------------|----------|-----------|-----------|----------|
| Q9ULX6 | A-kinase anchor protein 8-like                              | 3.78E-07 |           | 2.874E-07 |          |
| Q9UMS4 | Pre-mRNA-processing factor 19                               | 1.21E-07 | 2.575E-06 | 8.506E-08 | 2.66E-06 |
| Q9UNF1 | Melanoma-associated antigen D2                              | 2.83E-08 |           |           |          |
| Q9UPN7 | Serine/threonine-protein phosphatase 6 regulatory subunit 1 | 1.21E-07 |           | 5.194E-08 |          |
| Q9UPY3 | Endoribonuclease Dicer                                      | 1.08E-08 |           |           |          |
| Q9UQ13 | Leucine-rich repeat protein SHOC-2                          | 4.03E-08 |           |           |          |
| Q9UQ35 | Serine/arginine repetitive matrix protein 2                 |          | 3.949E-08 |           |          |
| Q9UQR1 | Zinc finger protein 148                                     |          | 1.171E-07 |           |          |
| Q9Y230 | RuvB-like 2                                                 | 5.38E-07 | 6.788E-07 | 3.426E-07 | 7.37E-07 |
| Q9Y265 | RuvB-like 1                                                 | 6.88E-07 | 1.462E-06 | 4.84E-07  | 1.27E-06 |
| Q9Y277 | Voltage-dependent anion-selective channel protein 3         | 3.27E-08 | 5.001E-07 |           |          |
| Q9Y2K7 | Lysine-specific demethylase 2A                              |          | 1.039E-07 |           | 1.52E-07 |
| Q9Y2W1 | Thyroid hormone receptor-associated protein 3               | 2.68E-08 | 1.829E-07 |           |          |
| Q9Y333 | U6 snRNA-associated Sm-like protein LSm2                    | 3.23E-07 | 2.912E-06 |           |          |
| Q9Y383 | Putative RNA-binding protein Luc7-like 2                    | 3.05E-08 | 1.436E-07 |           | 4.97E-07 |
| Q9Y3F4 | Serine-threonine kinase receptor-associated protein         | 1.91E-08 | 3.828E-07 | 6.745E-08 |          |
| Q9Y3I0 | tRNA-splicing ligase RtcB homolog                           | 2.47E-08 | 8.477E-08 |           |          |
| Q9Y3Z3 | Deoxynucleoside triphosphate triphosphohydrolase SAMHD1     | 6.79E-08 |           |           |          |
| Q9Y5M8 | Signal recognition particle receptor subunit beta           | 8.6E-08  | 1.696E-07 |           |          |
| Q9Y6G9 | Cytoplasmic dynein 1 light intermediate chain 1             | 1.42E-08 | 1.147E-07 |           |          |
| Q9Y6K1 | DNA (cytosine-5)-methyltransferase 3A                       |          | 6.196E-08 |           |          |
| Q9Y6V7 | Probable ATP-dependent RNA helicase DDX49                   |          | 6.272E-08 |           |          |
| Q9Y6W5 | Wiskott-Aldrich syndrome protein family member 2            |          | 2.176E-07 |           |          |
| A8MQB8 | Fragile X mental retardation protein 1                      |          | 8.231E-08 |           |          |
| E9PAU2 | Ribonucleoprotein PTB-binding 1                             | 3.24E-08 | 1.076E-07 |           |          |
| E9PCY5 | DNA topoisomerase 2 (Fragment)                              | 1.11E-06 | 0.000013  | 4.87E-07  | 1.2E-05  |
| H3BUF6 | Ataxin-2-like protein                                       | 1.86E-08 | 9.027E-08 |           |          |
| M0QZM1 | Heterogeneous nuclear ribonucleoprotein M (Fragment)        |          | 6.325E-08 |           |          |
| Q59FY4 | Acetyl-CoA carboxylase 1 (Fragment)                         |          | 2.65E-08  |           |          |
| Q5T6W1 | Heterogeneous nuclear ribonucleoprotein K                   |          | 8.042E-08 |           | 1.49E-07 |
| S4R3J4 | Heterogeneous nuclear ribonucleoprotein R                   |          | 1.708E-08 |           |          |
| O75694 | Nuclear pore complex protein Nup155                         |          |           | 4.105E-09 | 5.23E-08 |
| O95433 | Activator of 90 kDa heat shock protein ATPase homolog 1     |          |           | 4.934E-07 |          |
| P04908 | Histone H2A type 1-B/E                                      |          |           |           | 1.8E-06  |
| P05089 | Arginase-1                                                  |          |           | 3.825E-08 | 3.08E-07 |
| P05109 | Protein S100-A8                                             |          |           | 8.004E-08 | 8.55E-06 |
| P06702 | Protein S100-A9                                             |          |           |           | 7.4E-06  |
| P06733 | Alpha-enolase                                               |          |           | 4.452E-08 |          |
| P0CG38 | POTE ankyrin domain family member I                         |          |           | 4.781E-08 | 2.56E-07 |

|        |                                                                           |           |          |
|--------|---------------------------------------------------------------------------|-----------|----------|
| P14618 | Pyruvate kinase PKM                                                       | 1.968E-08 |          |
| P18621 | 60S ribosomal protein L17                                                 | 2.61E-07  |          |
| P30837 | Aldehyde dehydrogenase X, mitochondrial                                   | 5.498E-08 |          |
| P31153 | S-adenosylmethionine synthase isoform type-2                              | 5.197E-09 |          |
| P31944 | Caspase-14                                                                |           | 5.74E-07 |
| P42766 | 60S ribosomal protein L35                                                 | 2.87E-07  | 9.44E-07 |
| P43246 | DNA mismatch repair protein Msh2                                          | 1.154E-08 |          |
| P51570 | Galactokinase                                                             | 4.288E-08 |          |
| P52732 | Kinesin-like protein KIF11                                                | 1.346E-08 |          |
| P60842 | Eukaryotic initiation factor 4A-I                                         | 1.258E-06 | 1.45E-07 |
| P63151 | Serine/threonine-protein phosphatase 2A 55 kDa regulatory subunit B alpha | 4.484E-09 |          |
| P78347 | General transcription factor II-I                                         | 2.811E-08 |          |
| P83731 | 60S ribosomal protein L24                                                 | 1.323E-07 |          |
| Q01469 | Fatty acid-binding protein, epidermal                                     |           | 6.07E-07 |
| Q02413 | Desmoglein-1                                                              | 2.023E-08 | 4.43E-07 |
| Q06830 | Peroxiredoxin-1                                                           | 5.369E-08 | 3.13E-07 |
| Q12931 | Heat shock protein 75 kDa, mitochondrial                                  | 8.542E-09 |          |
| Q13576 | Ras GTPase-activating-like protein IQGAP2                                 | 5.185E-09 |          |
| Q15517 | Corneodesmosin                                                            | 5.758E-08 | 1.95E-07 |
| Q15814 | Tubulin-specific chaperone C                                              | 3.814E-08 |          |
| Q16891 | Mitochondrial inner membrane protein                                      | 2.285E-08 |          |
| Q5JTW2 | Centrosomal protein of 78 kDa                                             | 9.066E-09 |          |
| Q6DN90 | IQ motif and SEC7 domain-containing protein 1                             | 2.797E-08 |          |
| Q6PEY2 | Tubulin alpha-3E chain                                                    | 5.639E-08 |          |
| Q6UWP8 | Suprabasin                                                                | 6.112E-09 | 2.22E-07 |
| Q71UM5 | 40S ribosomal protein S27-like                                            | 4.192E-07 |          |
| Q86V81 | THO complex subunit 4                                                     |           | 7.19E-07 |
| Q8N680 | Zinc finger and BTB domain-containing protein 2                           |           | 3.98E-07 |
| Q8WUM0 | Nuclear pore complex protein Nup133                                       | 2.792E-08 |          |
| Q96EP5 | DAZ-associated protein 1                                                  |           | 8.34E-07 |
| Q96F07 | Cytoplasmic FMR1-interacting protein 2                                    | 4.105E-08 |          |
| Q96GX2 | Putative ataxin-7-like protein 3B                                         | 2.295E-07 |          |
| Q96HS1 | Serine/threonine-protein phosphatase PGAM5, mitochondrial                 | 9.367E-08 |          |
| Q96JG8 | Melanoma-associated antigen D4                                            | 8.785E-08 |          |
| Q96P63 | Serpin B12                                                                | 5.153E-09 | 2.87E-07 |
| Q99707 | Methionine synthase                                                       | 6.509E-09 |          |
| Q9BYW2 | Histone-lysine N-methyltransferase SETD2                                  | 4.887E-09 |          |
| Q9H936 | Mitochondrial glutamate carrier 1                                         | 9.311E-08 |          |
| Q9NY74 | Ewing's tumor-associated antigen 1                                        | 9.502E-09 |          |

|        |                                                 |           |
|--------|-------------------------------------------------|-----------|
| Q9UKA4 | A-kinase anchor protein 11                      | 7.25E-09  |
| Q9UQE7 | Structural maintenance of chromosomes protein 3 | 1.545E-09 |
| Q9Y2X9 | Zinc finger protein 281                         | 3.905E-08 |

**Supplemental Table 2. Identity and relative SINQ scores of proteins that co-purified with PB2-Strep**

Protein SINQ scores were normalised and non-specific binding proteins were removed (see Materials and Methods for details). Identified protein SINQ scores were normalised to PB2-Strep SINQ score.

<sup>a</sup>UniProt ID of human protein or viral protein name.

<sup>b</sup>Short gene name for each identified protein.

<sup>c</sup>Mean SINQ score of each protein (missing data did not contribute to the mean).

<sup>d</sup>SD ( $N > 2$ ) or half-range ( $N = 2$ ).

<sup>e</sup>Number of experiments in which the protein was identified.

| Protein <sup>a</sup> | Short Name <sup>b</sup> | Description                                              | Mean SINQ Score <sup>c</sup> | (+/-) <sup>d</sup> | N <sup>e</sup> |
|----------------------|-------------------------|----------------------------------------------------------|------------------------------|--------------------|----------------|
| NP                   | NP                      | Influenza A/WSN/33 NP                                    | 8.076611961                  | 2.183442           | 3              |
| PB2-Strep            | PB2-Strep               | Influenza A/WSN/33 PB2-Strep                             | 1                            |                    | 3              |
| PB1                  | PB1                     | Influenza A/WSN/33 PB1                                   | 0.786299188                  | 0.033873           | 3              |
| PA                   | PA                      | Influenza A/WSN/33 PA                                    | 0.596522858                  | 0.103631           | 3              |
| P11142               | HSPA8                   | Heat shock cognate 71 kDa protein                        | 0.091249799                  | 0.003725           | 3              |
| P07437               | TUBB                    | Tubulin beta chain                                       | 0.034142773                  | 0.0302             | 3              |
| P62987               | UBA52                   | Ubiquitin-60S ribosomal protein L40                      | 0.032312034                  | 0.005382           | 2              |
| P62979               | RPS27A                  | Ubiquitin-40S ribosomal protein S27a                     | 0.019067003                  | 0.018313           | 2              |
| Q14257               | RCN2                    | Reticulocalbin-2                                         | 0.015968216                  | 0.013516           | 3              |
| O00410               | IPO5                    | Importin-5                                               | 0.015526085                  | 0.000637           | 3              |
| P10809               | HSPD1                   | 60 kDa heat shock protein, mitochondrial                 | 0.011939713                  | 0.010298           | 3              |
| O95816               | BAG2                    | BAG family molecular chaperone regulator 2               | 0.010648861                  | 0.003614           | 2              |
| P60842               | EIF4A1                  | Eukaryotic initiation factor 4A                          | 0.010235964                  |                    | 1              |
| P68371               | TUBB4B                  | Tubulin beta-4B chain                                    | 0.010159805                  | 0.005726           | 3              |
| O60884               | DNAJA2                  | DnaJ homolog subfamily A member 2                        | 0.009808361                  | 0.008133           | 3              |
| P50402               | EMD                     | Emerin                                                   | 0.009800935                  | 0.007514           | 3              |
| P31689               | DNAJA1                  | DnaJ homolog subfamily A member 1                        | 0.008964199                  | 0.005032           | 3              |
| O00743               | PPP6C                   | Serine/threonine-protein phosphatase 6 catalytic subunit | 0.007929034                  | 0.002908           | 3              |
| P12236               | SLC25A6                 | ADP/ATP translocase 3                                    | 0.007816372                  | 0.012091           | 3              |
| Q99832               | CCT7                    | T-complex protein 1 subunit eta                          | 0.007711209                  | 0.000724           | 3              |
| P50990               | CCT8                    | T-complex protein 1 subunit theta                        | 0.007604392                  | 0.001379           | 2              |
| P05455               | SSB                     | Lupus La protein                                         | 0.007476909                  | 0.000948           | 2              |
| Q16531               | DDB1                    | DNA damage-binding protein 1                             | 0.006396893                  | 0.000712           | 3              |
| O00165               | HAX1                    | HCLS1-associated protein X-1                             | 0.006218454                  | 0.005249           | 2              |
| P78371               | CCT2                    | T-complex protein 1 subunit beta                         | 0.005982113                  | 0.000264           | 2              |
| O00505               | KPNA3                   | Importin subunit alpha-4                                 | 0.00569974                   | 0.000459           | 3              |

|        |          |                                                               |             |          |   |
|--------|----------|---------------------------------------------------------------|-------------|----------|---|
| O75190 | DNAJB6   | DnaJ homolog subfamily B member 6                             | 0.005574937 | 0.005329 | 3 |
| P50991 | CCT4     | T-complex protein 1 subunit delta                             | 0.005464235 | 0.004143 | 3 |
| Q9Y5V3 | MAGED1   | Melanoma-associated antigen D1                                | 0.005157536 | 0.001266 | 3 |
| P62857 | RPS28    | 40S ribosomal protein S28                                     | 0.005152026 | 0.002444 | 2 |
| Q9H9A6 | LRRC40   | Leucine-rich repeat-containing protein 40                     | 0.004716811 | 0.001386 | 2 |
| P10644 | PRKAR1A  | cAMP-dependent protein kinase type I-alpha regulatory subunit | 0.004710566 | 0.000169 | 2 |
| P49368 | CCT3     | T-complex protein 1 subunit gamma                             | 0.004568045 | 0.002795 | 3 |
| Q00325 | SLC25A3  | Phosphate carrier protein, mitochondrial                      | 0.004522392 | 0.00326  | 2 |
| P17987 | CCT1     | T-complex protein 1 subunit alpha                             | 0.004301543 | 0.001441 | 3 |
| Q9BUF5 | TUBB6    | Tubulin beta-6 chain                                          | 0.004248102 | 0.000194 | 2 |
| O00629 | KPNA4    | Importin subunit alpha-3                                      | 0.004101055 | 7.49E-05 | 3 |
| Q5H9R7 | PPP6R3   | Serine/threonine-protein phosphatase 6 regulatory subunit 3   | 0.004039222 | 0.001902 | 3 |
| O95433 | AHSA1    | Activator of 90 kDa heat shock protein ATPase homolog 1       | 0.004014646 |          | 1 |
| Q5W0B1 | RNF219   | RING finger protein 219                                       | 0.003909317 | 3.71E-05 | 2 |
| P40227 | CCT6A    | T-complex protein 1 subunit zeta                              | 0.003627412 | 0.001935 | 3 |
| Q71UM5 | RPS27L   | 40S ribosomal protein S27-like                                | 0.003410903 |          | 1 |
| Q9Y4B6 | VPRBP    | Protein VPRBP                                                 | 0.00296147  | 0.001444 | 3 |
| P48643 | CCT5     | T-complex protein 1 subunit epsilon                           | 0.002952142 | 0.001669 | 3 |
| Q9BVA1 | TUBB2B   | Tubulin beta-2B chain                                         | 0.002841552 | 0.002934 | 3 |
| P54886 | ALDH18A1 | Delta-1-pyrroline-5-carboxylate synthase                      | 0.00282716  | 0.000115 | 2 |
| P49411 | TUFM     | Elongation factor Tu, mitochondrial                           | 0.002818283 | 0.003018 | 3 |
| Q5TAQ9 | DCAF8    | DDB1- and CUL4-associated factor 8                            | 0.002624835 | 0.00183  | 3 |
| NA     | NA       | Influenza A/WSN/33 NA                                         | 0.002469202 | 0.001605 | 3 |
| Q96D09 | GPRASP2  | G-protein coupled receptor-associated sorting protein 2       | 0.002457759 | 0.001898 | 3 |
| P23284 | PPIB     | Peptidyl-prolyl cis-trans isomerase B                         | 0.002449062 |          | 1 |
| Q9ULX6 | AKAP8L   | A-kinase anchor protein 8-like                                | 0.002435664 | 9.72E-05 | 2 |
| O43164 | PJA2     | E3 ubiquitin-protein ligase Praja-2                           | 0.002427387 | 0.001131 | 3 |
| P06730 | EIF4E    | Eukaryotic translation initiation factor 4E                   | 0.002376757 | 0.000544 | 2 |
| O60684 | KPNA6    | Importin subunit alpha-7                                      | 0.002322559 | 0.001888 | 3 |
| O95831 | AIFM1    | Apoptosis-inducing factor 1, mitochondrial                    | 0.00226055  | 0.001237 | 3 |
| P51571 | SSR4     | Translocon-associated protein subunit delta                   | 0.002180429 | 0.000655 | 3 |
| O15355 | PPM1G    | Protein phosphatase 1G                                        | 0.00214739  | 0.000377 | 2 |
| P13674 | P4HA1    | Prolyl 4-hydroxylase subunit alpha-1                          | 0.002131323 | 0.000162 | 2 |
| P18621 | RPL17    | 60S ribosomal protein L17                                     | 0.002123678 |          | 1 |
| O14654 | IRS4     | Insulin receptor substrate 4                                  | 0.002007418 | 0.000821 | 3 |
| Q9BW61 | DDA1     | DET1- and DDB1-associated protein 1                           | 0.001947721 |          | 1 |
| P62258 | YWHAE    | 14-3-3 protein epsilon                                        | 0.00191622  |          | 1 |
| Q9Y5A9 | YTHDF2   | YTH domain family protein 2                                   | 0.001873114 | 0.001641 | 3 |
| Q96GX2 | ATXN7L3B | Putative ataxin-7-like protein 3B                             | 0.001867372 |          | 1 |

|        |          |                                                               |             |          |   |
|--------|----------|---------------------------------------------------------------|-------------|----------|---|
| A6NKZ8 | TBB      | Putative tubulin beta chain-like protein ENSP00000290377      | 0.001852663 | 1.87E-05 | 2 |
| Q9NS69 | TOMM22   | Mitochondrial import receptor subunit TOM22 homolog           | 0.001845174 |          | 1 |
| Q9BQE3 | TUBA1C   | Tubulin alpha-1C chain                                        | 0.00184362  | 0.000397 | 3 |
| Q3ZCQ8 | TIMM50   | Mitochondrial import inner membrane translocase subunit TIM50 | 0.001610467 | 0.000388 | 2 |
| P10155 | TROVE2   | 60 kDa SS-A/Ro ribonucleoprotein                              | 0.001602436 | 0.001232 | 3 |
| Q96HN2 | AHCYL2   | Putative adenosylhomocysteinase 3                             | 0.001575258 | 0.00104  | 3 |
| Q12899 | TRIM26   | Tripartite motif-containing protein 26                        | 0.001550826 |          | 1 |
| Q96EY1 | DNAJA3   | DnaJ homolog subfamily A member 3, mitochondrial              | 0.001451599 | 0.000902 | 3 |
| Q9UJS0 | SLC25A13 | Calcium-binding mitochondrial carrier protein Aralar2         | 0.001335348 | 0.001032 | 3 |
| Q9UNK9 | ANGEL1   | Protein angel homolog 1                                       | 0.001322951 | 0.00084  | 3 |
| P07900 | HSP90AA1 | Heat shock protein HSP 90-alpha                               | 0.001276455 | 0.000488 | 2 |
| P04350 | TUBB4A   | Tubulin beta-4A chain                                         | 0.001266686 | 8.12E-05 | 2 |
| Q13885 | TUBB2A   | Tubulin beta-2A chain                                         | 0.001232641 | 0.000712 | 2 |
| P55209 | NAP1L1   | Nucleosome assembly protein 1-like 1                          | 0.001223861 |          | 1 |
| Q9BQ70 | TCF25    | Transcription factor 25                                       | 0.001191177 | 0.001451 | 3 |
| P52294 | KPNA1    | Importin subunit alpha-5                                      | 0.001121115 | 0.000406 | 3 |
| P83731 | RPL24    | 60S ribosomal protein L24                                     | 0.001076485 |          | 1 |
| Q04917 | YWHAH    | 14-3-3 protein eta                                            | 0.001073056 |          | 1 |
| Q7Z4H7 | HAUS6    | HAUS augmin-like complex subunit 6                            | 0.000982249 | 0.000374 | 2 |
| P31040 | SDHA     | Succinate dehydrogenase flavoprotein subunit, mitochondrial   | 0.000838648 | 0.000209 | 2 |
| Q00587 | CDC42EP1 | Cdc42 effector protein 1                                      | 0.000824493 | 0.000212 | 2 |
| P00403 | MT-CO2   | Cytochrome c oxidase subunit 2                                | 0.000781501 |          | 1 |
| P22694 | PRKACB   | cAMP-dependent protein kinase catalytic subunit beta          | 0.00077855  | 0.001254 | 3 |
| Q96HS1 | PGAM5    | Serine/threonine-protein phosphatase PGAM5, mitochondrial     | 0.000762164 |          | 1 |
| Q9H936 | SLC25A22 | Mitochondrial glutamate carrier 1                             | 0.000757608 |          | 1 |
| Q99615 | DNAJC7   | DnaJ homolog subfamily C member 7                             | 0.00075237  | 0.000274 | 2 |
| P62195 | PSMC5    | 26S protease regulatory subunit 8                             | 0.00075134  |          | 1 |
| Q96JG8 | MAGED4   | Melanoma-associated antigen D4                                | 0.000714809 |          | 1 |
| Q9UPN7 | PPP6R1   | Serine/threonine-protein phosphatase 6 regulatory subunit 1   | 0.000617811 | 0.000195 | 2 |
| Q7Z6Z7 | HUWE1    | E3 ubiquitin-protein ligase HUWE1                             | 0.00061249  | 0.000273 | 3 |
| Q9NXW2 | DNAJB12  | DnaJ homolog subfamily B member 12                            | 0.000595241 |          | 1 |
| P27708 | CAD      | CAD protein                                                   | 0.000576443 | 0.000168 | 3 |
| Q71U36 | TUBA1A   | Tubulin alpha-1A chain                                        | 0.000531576 | 0.000295 | 2 |
| O43865 | AHCYL1   | Putative adenosylhomocysteinase 2                             | 0.00053033  | 0.000398 | 3 |
| Q13509 | TUBB3    | Tubulin beta-3 chain                                          | 0.000526449 | 0.00026  | 3 |
| Q96DF8 | DGCR14   | Protein DGCR14                                                | 0.00051756  |          | 1 |
| Q9GZZ9 | UBA5     | Ubiquitin-like modifier-activating enzyme 5                   | 0.000498137 | 0.000214 | 2 |
| Q8NFH5 | NUP35    | Nucleoporin NUP53                                             | 0.000480697 |          | 1 |
| Q5JTC6 | AMER1    | APC membrane recruitment protein 1                            | 0.000475951 | 0.000225 | 2 |

|        |         |                                                                                   |             |          |   |
|--------|---------|-----------------------------------------------------------------------------------|-------------|----------|---|
| Q9NRZ9 | HELLS   | Lymphoid-specific helicase                                                        | 0.000460389 |          | 1 |
| Q6PEY2 | TUBA3E  | Tubulin alpha-3E chain                                                            | 0.000458828 |          | 1 |
| Q9Y3Z3 | SAMHD1  | Deoxynucleoside triphosphate triphosphohydrolase SAMHD1                           | 0.000455027 |          | 1 |
| P30837 | ALDH1B1 | Aldehyde dehydrogenase X, mitochondrial OS=Homo sapiens                           | 0.000447356 |          | 1 |
| O43823 | AKAP8   | A-kinase anchor protein 8                                                         | 0.000436187 | 3.71E-05 | 2 |
| P63104 | YWHAZ   | 14-3-3 protein zeta/delta                                                         | 0.000384816 | 0.000279 | 2 |
| O75153 | CLUH    | Clustered mitochondria protein homolog                                            | 0.000384686 | 7.53E-05 | 3 |
| P25398 | RPS12   | 40S ribosomal protein S12                                                         | 0.000384517 |          | 1 |
| P30153 | PPP2R1A | Serine/threonine-protein phosphatase 2A 65 kDa regulatory subunit A alpha isoform | 0.000381702 |          | 1 |
| P34931 | HSPA1L  | Heat shock 70 kDa protein 1-like                                                  | 0.000366836 |          | 1 |
| Q92945 | KHSRP   | Far upstream element-binding protein 2                                            | 0.000366756 |          | 1 |
| P06733 | ENO1    | Alpha-enolase OS=Homo sapiens                                                     | 0.000362246 |          | 1 |
| Q93008 | USP9X   | Probable ubiquitin carboxyl-terminal hydrolase FAF-X                              | 0.000357006 | 3.57E-05 | 2 |
| P51570 | GALK1   | Galactokinase                                                                     | 0.000348902 |          | 1 |
| Q14677 | CLINT1  | Clathrin interactor 1                                                             | 0.000334935 | 5.95E-05 | 2 |
| Q96F07 | CYFIP2  | Cytoplasmic FMR1-interacting protein 2                                            | 0.000334011 |          | 1 |
| Q8WV44 | TRIM41  | E3 ubiquitin-protein ligase TRIM41                                                | 0.000320945 | 2.24E-06 | 2 |
| Q9Y2X9 | ZNF281  | Zinc finger protein 281                                                           | 0.000317738 |          | 1 |
| Q15814 | TBCC    | Tubulin-specific chaperone C                                                      | 0.000310334 |          | 1 |
| O95071 | UBR5    | E3 ubiquitin-protein ligase UBR5                                                  | 0.000304627 | 2.06E-05 | 2 |
| O43423 | ANP32C  | Acidic leucine-rich nuclear phosphoprotein 32 family member C                     | 0.000301542 |          | 1 |
| P13489 | RNH1    | Ribonuclease inhibitor                                                            | 0.000297922 |          | 1 |
| O15269 | SPTLC1  | Serine palmitoyltransferase 1                                                     | 0.000284517 |          | 1 |
| Q9UQ13 | SHOC2   | Leucine-rich repeat protein SHOC-2                                                | 0.000270107 |          | 1 |
| P30876 | POLR2B  | DNA-directed RNA polymerase II subunit RPB2                                       | 0.000256711 | 6.8E-05  | 2 |
| P57740 | NUP107  | Nuclear pore complex protein Nup107                                               | 0.000255113 | 8.65E-05 | 2 |
| P07237 | P4HB    | Protein disulfide-isomerase                                                       | 0.000243399 | 2.7E-05  | 2 |
| Q9UG63 | ABCF2   | ATP-binding cassette sub-family F member 2                                        | 0.000235255 |          | 1 |
| P78347 | GTF2I   | General transcription factor II-I                                                 | 0.000228723 |          | 1 |
| Q6DN90 | IQSEC1  | IQ motif and SEC7 domain-containing protein 1                                     | 0.000227583 |          | 1 |
| Q8WUM0 | NUP133  | Nuclear pore complex protein Nup133                                               | 0.000227177 |          | 1 |
| O94776 | MTA2    | Metastasis-associated protein MTA2                                                | 0.000212131 |          | 1 |
| Q96S55 | WRNIP1  | ATPase WRNIP1 OS=Homo sapiens                                                     | 0.000202972 | 6.27E-05 | 2 |
| Q9UL15 | BAG5    | BAG family molecular chaperone regulator 5                                        | 0.000202413 |          | 1 |
| Q9UNF1 | MAGED2  | Melanoma-associated antigen D2                                                    | 0.000189611 |          | 1 |
| Q16891 | IMMT    | Mitochondrial inner membrane protein                                              | 0.000185924 |          | 1 |
| Q6R327 | RICTOR  | Rapamycin-insensitive companion of mTOR                                           | 0.000167164 | 7.2E-05  | 2 |
| P25686 | DNAJB2  | DnaJ homolog subfamily B member 2                                                 | 0.000161394 |          | 1 |
| P14618 | PKM     | Pyruvate kinase PKM                                                               | 0.00016013  |          | 1 |

|        |          |                                                                                   |             |          |   |
|--------|----------|-----------------------------------------------------------------------------------|-------------|----------|---|
| Q92552 | MRPS27   | 28S ribosomal protein S27, mitochondrial                                          | 0.000159115 |          | 1 |
| Q2NKX8 | ERCC6L   | DNA excision repair protein ERCC-6-like                                           | 0.000145845 |          | 1 |
| P61964 | WDR5     | WD repeat-containing protein 5                                                    | 0.000139276 |          | 1 |
| O75489 | NDUFS3   | NADH dehydrogenase [ubiquinone] iron-sulfur protein 3, mitochondrial              | 0.000134182 |          | 1 |
| O60518 | RANBP6   | Ran-binding protein 6                                                             | 0.000132529 |          | 1 |
| Q5SW79 | CEP170   | Centrosomal protein of 170 kDa                                                    | 0.000129118 | 7.33E-06 | 2 |
| O15160 | POLR1C   | DNA-directed RNA polymerases I and III subunit RPAC1                              | 0.000128954 |          | 1 |
| P52732 | KIF11    | Kinesin-like protein KIF11                                                        | 0.00010952  |          | 1 |
| O15027 | SEC16A   | Protein transport protein Sec16A                                                  | 0.000100418 | 3.74E-05 | 2 |
| Q14739 | LBR      | Lamin-B receptor                                                                  | 0.000100134 |          | 1 |
| O75746 | SLC25A12 | Calcium-binding mitochondrial carrier protein Aralar1                             | 9.84624E-05 | 8.01E-05 | 2 |
| P43246 | MSH2     | DNA mismatch repair protein Msh2                                                  | 9.38975E-05 |          | 1 |
| Q96EB6 | SIRT1    | NAD-dependent protein deacetylase sirtuin-1                                       | 8.98794E-05 |          | 1 |
| P49790 | NUP153   | Nuclear pore complex protein Nup153                                               | 7.73458E-05 |          | 1 |
| Q9NY74 | ETAA1    | Ewing's tumor-associated antigen 1                                                | 7.73149E-05 |          | 1 |
| Q96GX5 | MASTL    | Serine/threonine-protein kinase greatwall                                         | 7.55362E-05 |          | 1 |
| O43837 | IDH3B    | Isocitrate dehydrogenase [NAD] subunit beta, mitochondrial                        | 7.45979E-05 |          | 1 |
| Q5JTW2 | CEP78    | Centrosomal protein of 78 kDa                                                     | 7.37673E-05 |          | 1 |
| Q9UPY3 | DICER1   | Endoribonuclease Dicer                                                            | 7.25201E-05 |          | 1 |
| Q12931 | TRAP1    | Heat shock protein 75 kDa, mitochondrial                                          | 6.95037E-05 |          | 1 |
| Q9UKA4 | AKAP11   | A-kinase anchor protein 11                                                        | 5.8991E-05  |          | 1 |
| Q99707 | MTR      | Methionine synthase                                                               | 5.29618E-05 |          | 1 |
| Q9BXW9 | FANCD2   | Fanconi anemia group D2 protein                                                   | 4.45308E-05 |          | 1 |
| Q9ULT8 | HECTD1   | E3 ubiquitin-protein ligase HECTD1                                                | 4.31568E-05 |          | 1 |
| P31153 | MAT2A    | S-adenosylmethionine synthase isoform type-2                                      | 4.22864E-05 |          | 1 |
| Q13576 | IQGAP2   | Ras GTPase-activating-like protein IQGAP2                                         | 4.21888E-05 |          | 1 |
| B5ME19 | EIF3CL   | Eukaryotic translation initiation factor 3 subunit C-like protein                 | 4.14343E-05 |          | 1 |
| Q9BYW2 | SETD2    | Histone-lysine N-methyltransferase SETD2                                          | 3.9764E-05  |          | 1 |
| P63151 | PPP2R2A  | Serine/threonine-protein phosphatase 2A 55 kDa regulatory subunit B alpha isoform | 3.64849E-05 |          | 1 |
| Q96GA3 | LTV1     | Protein LTV1 homolog                                                              | 3.52212E-05 |          | 1 |
| P49327 | FASN     | Fatty acid synthase                                                               | 2.63271E-05 |          | 1 |
| Q9BSJ8 | ESYT1    | Extended synaptotagmin-1                                                          | 2.41354E-05 |          | 1 |
| Q9UQE7 | SMC3     | Structural maintenance of chromosomes protein 3                                   | 1.25712E-05 |          | 1 |
